1 **Natural variation in *C. elegans* short tandem repeats**

2 Gaotian Zhang<sup>1</sup>, Ye Wang<sup>1</sup>, and Erik C. Andersen<sup>1,\*</sup>

3 1. Department of Molecular Biosciences, Northwestern University, Evanston, IL 60208, USA

4

5 ORCID IDs:

6 0000-0001-6468-1341 (G.Z.)

7 0000-0002-5423-6196 (Y.W.)

8 0000-0003-0229-9651 (E.C.A.)

9

10 \*Corresponding author:

11 Erik C. Andersen

12 Department of Molecular Biosciences

13 Northwestern University

14 4619 Silverman Hall

15 2205 Tech Drive

16 Evanston, IL 60208

17 E-mail: [erik.andersen@northwestern.edu](mailto:erik.andersen@northwestern.edu)

## 18 **Abstract**

19           Short tandem repeats (STRs) represent an important class of genetic variation that can  
20 contribute to phenotypic differences. Although millions of single nucleotide variants (SNVs)  
21 and short indels have been identified among wild *Caenorhabditis elegans* strains, the natural  
22 diversity in STRs remains unknown. Here, we characterized the distribution of 31,991 STRs  
23 with motif lengths of 1-6 bp in the reference genome of *C. elegans*. Of these STRs, 27,636  
24 harbored polymorphisms across 540 wild strains and only 9,691 polymorphic STRs (pSTRs)  
25 had complete genotype data for more than 90% of the strains. Compared to the reference  
26 genome, the pSTRs showed more contraction than expansion. We found that STRs with  
27 different motif lengths were enriched in different genomic features, among which coding  
28 regions showed the lowest STR diversity and constrained STR mutations. STR diversity also  
29 showed similar genetic divergence and selection signatures among wild strains as in previous  
30 studies using single-nucleotide variants. We further identified STR variation in two mutation  
31 accumulation line panels that were derived from two wild strains and found background-  
32 dependent and fitness-dependent STR mutations. Overall, our results delineate the first large-  
33 scale characterization of STR variation in wild *C. elegans* strains and highlight the effects of  
34 selection on STR mutations.

## 35 Introduction

36 Short tandem repeats (STRs) are repetitive elements consisting of 1-6 bp DNA sequence  
37 motifs that provide a large source for genetic variation in both inherited and *de novo* mutations  
38 (Willems et al. 2016; Fotsing et al. 2019). The predominant mechanism of STR mutations is  
39 DNA replication slippage, which often causes expansion or contraction in the number of  
40 repeats (Mirkin 2007; Gemayel et al. 2010). Because of their intrinsically unstable nature, STRs  
41 have orders of magnitude higher mutation rates than other types of mutations, such as single  
42 nucleotide variants (SNVs) and short insertions or deletions (indels) (Lynch 2010; Sun et al.  
43 2012; Willems et al. 2016; Gymrek et al. 2017). The precise mutation rates of STRs are highly  
44 variable across different loci and are affected by motif sequences and repeat lengths (Legendre  
45 et al. 2007). In humans, STRs are estimated to constitute about 3% of the genome and are  
46 associated with dozens of diseases (Mirkin 2007; Hannan 2018; Malik et al. 2021). Emerging  
47 studies have also revealed the role of STRs in regulation of gene expression and complex traits  
48 in humans and other organisms, which were suggested to facilitate adaptation and accelerate  
49 evolution (Fotsing et al. 2019; Jakubosky et al. 2020; Reinart et al. 2021).

50 The free-living nematode *Caenorhabditis elegans* is a keystone model organism that  
51 has been found across the world (Brenner 1974; Kiontke et al. 2011; Andersen et al. 2012; Félix  
52 and Duveau 2012; Cook et al. 2017; Crombie et al. 2019; Lee et al. 2021; Crombie et al. 2022).  
53 The *C. elegans* Natural Diversity Resource (CeNDR) catalogs and distributes thousands of wild  
54 strains, genome sequence data, and genome-wide variation data, including single-nucleotide  
55 variants (SNVs) and short indels (Andersen et al. 2012; Cook et al. 2017; Evans et al. 2021).  
56 Numerous *C. elegans* population genomics studies and genome-wide association (GWA)  
57 studies have leveraged CeNDR resources, such as the genetic variant data across wild strains  
58 and the GWA mapping pipeline (Snoek et al. 2020; Evans et al. 2021; Lee et al. 2021; Gilbert  
59 et al. 2022; Widmayer et al. 2022; Zhang et al. 2022). However, the natural diversity in  
60 *C. elegans* STRs and their impacts on organism-level and molecular traits among wild strains  
61 remain unknown because of the lack of STR variation characterization. STRs are challenging

62 to genotype because of their repetitive nature causing errors such as “PCR stutters” (Gymrek  
63 2017). Recent advances provided opportunities to identify genome-wide STR variation  
64 accurately in large scales using high-throughput sequencing data (Willems et al. 2017).

65 In this work, we characterized 31,991 STRs with motif lengths of 1-6 bp in the  
66 reference genome of *C. elegans*. We identified natural variation in 27,636 STRs across 540  
67 genetically distinct wild strains and focused on 9,691 polymorphic STRs (pSTRs) with missing  
68 calls in less than 10% of all strains. We found enrichment of tri-STRs and hexa-STRs (motif  
69 lengths of 3 bp and 6 bp, respectively) in coding (CDS) regions, where STR mutations were  
70 likely constrained. Across all pSTRs, we observed more contraction than expansion when we  
71 compared wild strains to the reference strain, but the opposite situation could have occurred  
72 from the ancestors to descendants. We additionally found that the pSTRs showed similar  
73 selective patterns to SNVs, demonstrating that STRs are valuable markers to study population  
74 genetics. To further understand STR mutation and evolution in *C. elegans*, we identified 2,956  
75 pSTRs among 174 mutation accumulation lines that were derived from two wild strains using  
76 the same STR variant calling pipeline. We found that STR mutation types and rates were  
77 affected by genetic background and fitness of ancestors. Our results contribute to the  
78 complement of genetic variation characterization in *C. elegans*, develop an efficient STR  
79 variant calling pipeline, and provide publicly available resources for future studies.

## 80 Results

### 81 Genome-wide profiling of STR variation in *C. elegans*

82 To investigate the natural variation of *C. elegans* STRs, we first identified 31,991  
83 reference STRs in the *C. elegans* reference genome (table 1, supplementary table S1). These  
84 STRs comprise motif lengths of 1-6 bp and a minimum repeat number of 11, 6, 5, 3.75, 3.4, and  
85 3, respectively for each ascending motif length. The reference STRs were unevenly distributed  
86 across the genome (supplementary fig. S1A) with higher density on chromosome arms and tips  
87 than centers, suggesting that higher recombination is associated with the increasing incidence  
88 of STRs (Rockman and Kruglyak 2009). Mono-STRs (1 bp STRs) that contributed more than  
89 half of the reference STRs were also denser on arms and tips than centers, whereas STRs with  
90 motif lengths of 2-6 bp distributed differently across the genome (table 1, supplementary fig.  
91 S1B).

92 We examined natural variation in reference STRs across 540 genetically distinct wild  
93 *C. elegans* strains (Cook et al. 2017; Evans et al. 2021) and identified 9,691 polymorphic STRs  
94 (pSTRs) with missing calls in less than 10% of all strains (table 1, supplementary table S1). The  
95 density of pSTRs on arms and tips was not always higher than centers (fig. 1A) likely because  
96 DNA slippage, not recombination, is the major source of STR mutations (Kunkel 1993). Poor  
97 alignment in hyper-divergent regions (Lee et al. 2021) might also reduce the density of pSTRs  
98 in some regions, such as gaps at the left arm of chromosome II and the right arm of  
99 chromosome V (fig. 1A). The bases A and T were the most abundant motif sequences in both  
100 reference and polymorphic STRs, which is consistent with previous findings in *C. elegans* and  
101 many other eukaryotic genomes (Tóth et al. 2000; Denver et al. 2004; Saxena et al. 2019) (fig.  
102 1B, supplementary fig. S3A). We also found that different genomic features were enriched  
103 with STRs of different motif lengths (fig. 1C, D, supplementary fig. S3B, C, supplementary  
104 table S2). For example, the most prevalent  $A_n$  and  $T_n$  mono-STRs were only enriched in introns  
105 and intergenic regions (fig. 1D, E, supplementary fig. S3C, D, supplementary table S2). Tri-

106 STRs and hexa-STRs were enriched in CDS regions (fig. 1D, supplementary fig. S3C,  
 107 supplementary table S2), suggesting purifying selection constrains these STRs to maintain the  
 108 triplet code (Metzgar et al. 2000). The most enriched tri-STRs in CDS regions were (GGT)<sub>n</sub>  
 109 (fig. 1E, supplementary fig. S3D, supplementary table S2), which might correspond to glycine-  
 110 rich proteins as previously suggested in *C. elegans* (Ying et al. 2016).

111

112 **Table 1.**

113 **The distribution of STRs in *C. elegans*.** The numbers and length percentages of polymorphic  
 114 STRs (reference STRs in parentheses) of different motif lengths in each chromosome and in  
 115 the whole genome are shown.

116

| Chromo-<br>some | Mono-<br>STR      | Di-<br>STR       | Tri-<br>STR      | Tetra-<br>STR  | Penta-<br>STR | Hexa-<br>STR   | All<br>STR        | Percent of<br>genome (%) |
|-----------------|-------------------|------------------|------------------|----------------|---------------|----------------|-------------------|--------------------------|
| I               | 438<br>(3,094)    | 513<br>(1,068)   | 360<br>(610)     | 171<br>(363)   | 37<br>(100)   | 148<br>(500)   | 1,667<br>(5,735)  | 21<br>(91)               |
| II              | 420<br>(2,662)    | 372<br>(737)     | 305<br>(515)     | 165<br>(349)   | 58<br>(135)   | 193<br>(593)   | 1,513<br>(4,991)  | 21<br>(86)               |
| III             | 393<br>(3,104)    | 404<br>(859)     | 323<br>(552)     | 112<br>(261)   | 41<br>(109)   | 165<br>(461)   | 1,438<br>(5,346)  | 21<br>(87)               |
| IV              | 588<br>(3,162)    | 429<br>(867)     | 321<br>(608)     | 167<br>(354)   | 77<br>(168)   | 173<br>(429)   | 1,755<br>(5,588)  | 19<br>(65)               |
| V               | 443<br>(3,158)    | 308<br>(716)     | 299<br>(541)     | 128<br>(357)   | 49<br>(159)   | 160<br>(605)   | 1,387<br>(5,536)  | 13<br>(66)               |
| X               | 830<br>(2,733)    | 512<br>(949)     | 261<br>(434)     | 114<br>(233)   | 67<br>(152)   | 145<br>(292)   | 1,929<br>(4,793)  | 20<br>(52)               |
| MtDNA           | 1<br>(1)          | 0<br>(0)         | 0<br>(0)         | 1<br>(1)       | 0<br>(0)      | 0<br>(0)       | 2<br>(2)          | 21<br>(21)               |
| Genome          | 3,113<br>(17,914) | 2,538<br>(5,196) | 1,869<br>(3,260) | 858<br>(1,918) | 329<br>(823)  | 984<br>(2,880) | 9,691<br>(31,991) | 19<br>(73)               |

117

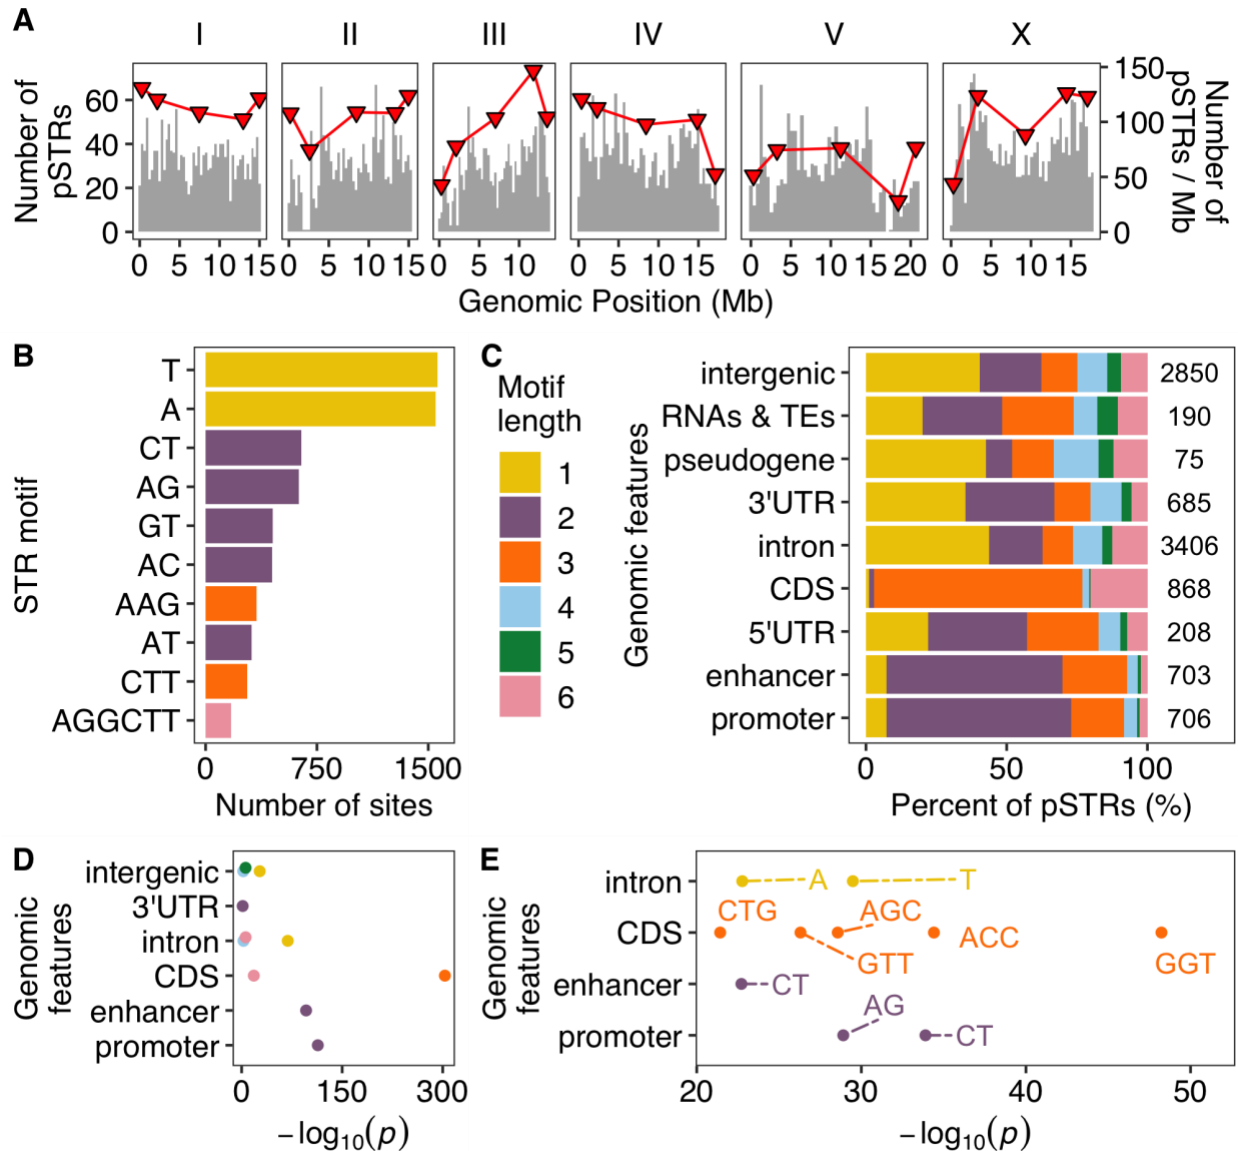

118

119 **FIG. 1.**

120 The distribution of polymorphic STRs across *C. elegans*. (A) The distribution of polymorphic  
 121 STRs (y-axis on the left) in the *C. elegans* genome. Red triangles represent the number of STRs  
 122 per Mb (y-axis on the right) in different genomic domains (tips, arms, and centers) (Rockman  
 123 and Kruglyak 2009). (B) The top ten most frequent motif sequences in polymorphic STRs are  
 124 shown on the y-axis, and the number of those sites on the x-axis. (C) Percent of polymorphic  
 125 STRs with different motif lengths in each genomic feature are shown on the x-axis, and  
 126 different genomic features on the y-axis. The total number of polymorphic STRs in each  
 127 genomic feature is indicated. (D) Enriched STRs with different motif lengths (colored as in  
 128 (C)) in different genomic features are shown. (E) The top 10 most enriched STR motif  
 129 sequences (labeled) in different genomic features are shown. Statistical significance for

130 enrichment tests (supplementary table S2) was calculated using one-side Fisher's exact tests  
131 and was corrected for multiple comparisons (Bonferroni method).  
132

### 133 **Polymorphic STRs are often contracted as compared to the reference genome**

134 STR mutations by DNA slippage are more likely to cause length variation in multiples  
135 of the motif lengths (Metzgar et al. 2000; Mirkin 2007) than single nucleotide substitutions. Of  
136 alternative alleles among wild *C. elegans* pSTRs, we observed that 30.2%, 35.5%, and 34.3%  
137 were insertions, deletions, or substitutions, respectively (fig. 2A). In the same 540 *C. elegans*  
138 strains, the proportions of SNVs and indels are 83.3% and 16.7%, respectively. To better  
139 understand STR mutations, we computed the expansion and contraction scores (Press et al.  
140 2018) by comparing the longest and/or shortest alternative alleles to the median alleles for  
141 each of the 7,506 pSTRs with length variation (fig. 2B). We found significantly higher  
142 contraction scores than expansion scores when we compared their absolute values for mono-,  
143 tri-, and tetra-STRs (fig. 2C, supplementary table S2). In di-STRs, however, the contraction  
144 scores were significantly lower than expansion scores (fig. 2C). Di-STRs stood out as exceptions  
145 again in allele frequencies, in which contracted alleles were at significantly lower frequency  
146 than expanded alleles (fig. 2D, supplementary table S2). We examined contraction and  
147 expansion in STRs with different motif sequences and focused on di-STRs (fig. 2E,  
148 supplementary fig. S4). All di-STRs had 36.9% to 38.6% alternative alleles expanded (fig. 2E),  
149 except (CG)<sub>n</sub> di-STRs, which only had 9.6% alternative alleles expanded. This difference might  
150 be functionally relevant because no enrichment of (CG)<sub>n</sub> di-STRs in any genomic features was  
151 observed, whereas (AC)<sub>n</sub>, (AG)<sub>n</sub>, (CT)<sub>n</sub>, and (GT)<sub>n</sub> di-STRs were enriched in promoters and  
152 enhancers, and (AT)<sub>n</sub> di-STRs were enriched in introns. Altogether, we found more STR  
153 contraction than expansion among wild *C. elegans*, with the exception of di-STRs.



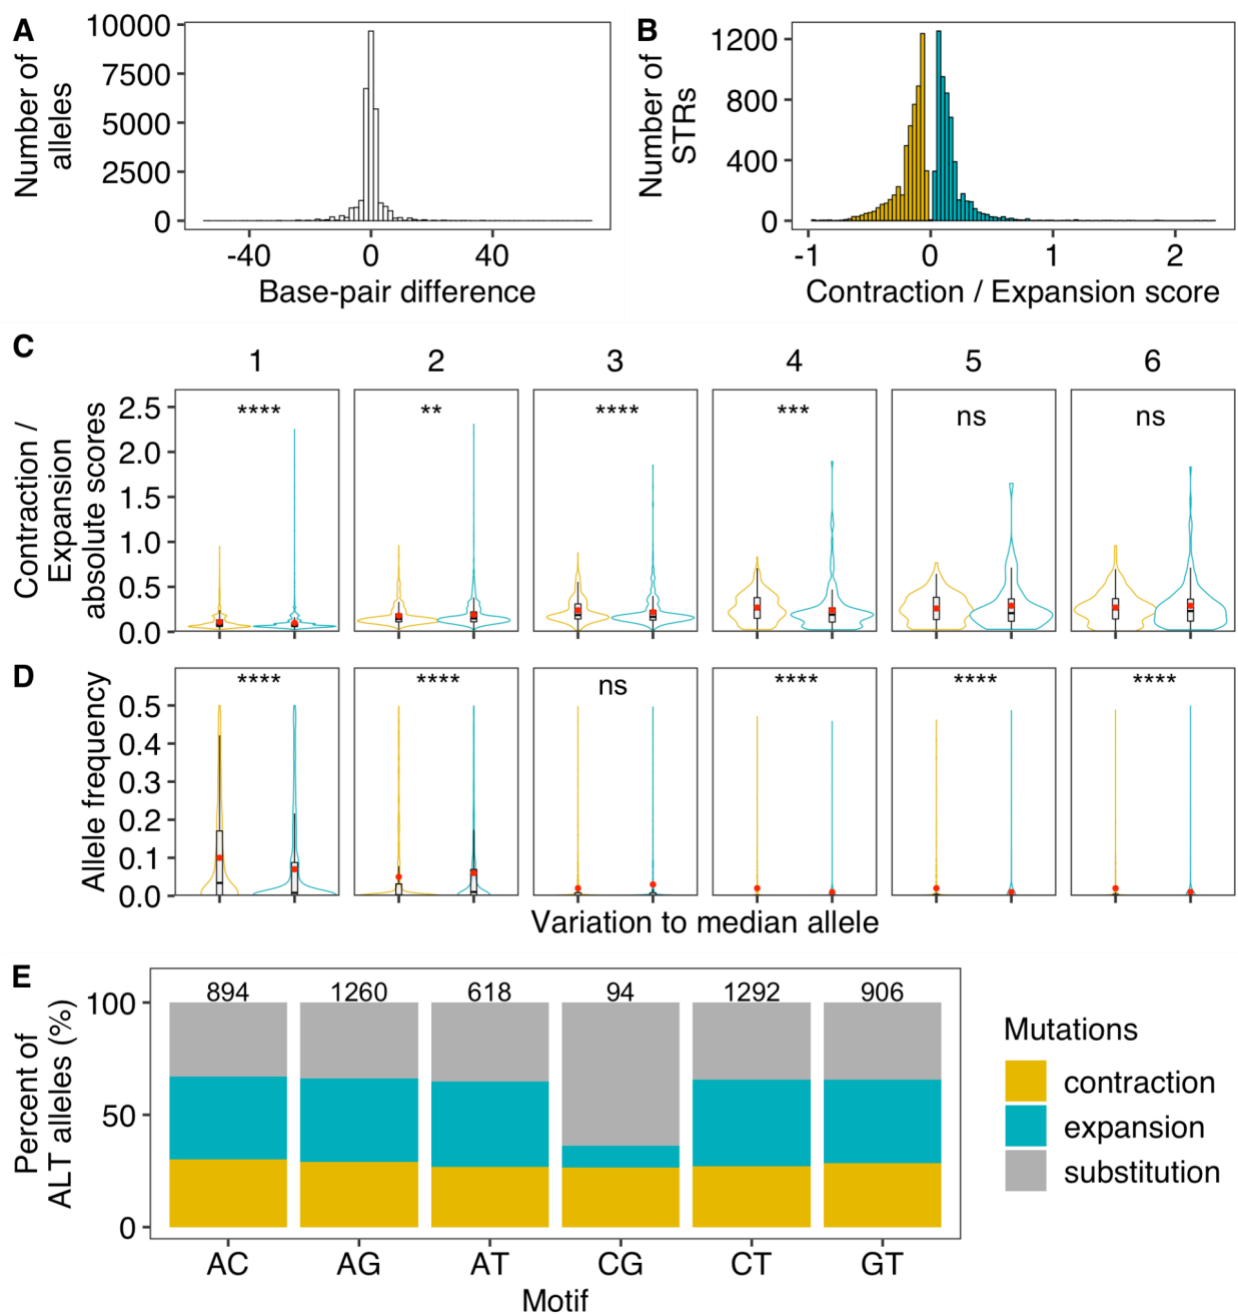

154

155 **FIG. 2.**

156 Contraction and expansion of polymorphic STRs. (A) The distribution of base-pair differences  
 157 for polymorphic STR alleles compared to the reference alleles is shown. Positive and negative  
 158 values on the x-axis indicate allele expansion and contraction, respectively, compared to the  
 159 reference alleles. (B) The distribution of Contraction (in yellow) and Expansion (in blue) scores  
 160 for each pSTR. Expansion score =  $[\max(\text{STR length}) - \text{median}(\text{STR length})] / \text{median}(\text{STR length})$ ;  
 161 Contraction score =  $[\min(\text{STR length}) - \text{median}(\text{STR length})] / \text{median}(\text{STR length})$ .

162 (C) Comparison of the absolute values between Contraction (in yellow) and Expansion (in  
163 blue) scores in polymorphic STRs with different motif lengths. (D) Comparison of allele  
164 frequencies between contracted (in yellow) and expanded alleles compared the median allele  
165 length in polymorphic STRs with different motif lengths. Statistical significance was calculated  
166 using the two-sided Wilcoxon test and was corrected for multiple comparisons (Bonferroni  
167 method). Significance of each comparison (supplementary table S2) is shown above each  
168 comparison pair (ns: adjusted  $p > 0.05$ ; \*: adjusted  $p \leq 0.05$ ; \*\*: adjusted  $p \leq 0.01$ ; \*\*\*: adjusted  $p$   
169  $\leq 0.001$ ; \*\*\*\*: adjusted  $p \leq 0.0001$ ). (E) Percent of alternative alleles showing contraction,  
170 expansion, and substitution in di-STRs. The total number of di-STRs with different motif  
171 sequences is indicated above each stacked bar.  
172

### 173 **STR diversity is correlated with the species-wide selective sweeps**

174 The majority of pSTRs among the 540 wild *C. elegans* strains were multiallelic with a  
175 median of three alleles per STR (fig. 3A). Only 4% of pSTRs had a major allele frequency less  
176 than 0.5 (fig. 3B), likely because *C. elegans* reproduces primarily by hermaphroditic selfing  
177 and recent selective sweeps have reduced diversity across the species (Andersen et al. 2012).  
178 The selective sweeps were thought to have purged diversity from the centers of chromosomes  
179 I, IV, and V, and the left arm of the X chromosome from the *C. elegans* global population.  
180 However, recent sampling efforts of wild *C. elegans* revealed higher genetic diversity in strains  
181 from the Hawaiian Islands and other regions in the Pacific Rim, which were hypothesized as  
182 the geographic origin of the species (Crombie et al. 2019; Lee et al. 2021; Crombie et al. 2022).  
183 We have previously classified wild *C. elegans* into swept and divergent strains based on the  
184 proportion of swept haplotypes that were identified using SNVs across the genome (See  
185 Materials and Methods) (Crombie et al. 2019; Lee et al. 2021; Zhang et al. 2021). Here, we  
186 observed a much higher density of pSTRs with major allele frequencies close to 1 among the  
187 357 swept strains than among all the 540 strains or among the 183 divergent strains (fig. 3B).  
188 Within divergent strains, more than 9% of pSTRs had a major allele frequency less than 0.5  
189 (fig. 3B). We also found that divergent strains had a significantly higher percentage of  
190 homozygous alternative alleles and heterozygous alleles than swept strains (Wilcoxon test  
191 with Bonferroni-corrected  $p = 9.2E-74$  and  $4.9E-10$ , respectively) (fig. 3C). Furthermore,

192 principal component analysis (Price et al. 2006) using pSTRs and SNVs showed similar clusters  
193 using the 540 strains, which largely correspond to the geographic locations of these strains (fig.  
194 3D, E). The 163 Hawaiian strains, including 157 divergent strains, were mostly separated from  
195 the global strains that had experienced the selective sweeps (fig. 3D, E). To further explore the  
196 STR diversity in *C. elegans*, we calculated the expected heterozygosity ( $H_E$ ) for each pSTR  
197 among all strains, only among swept strains, or only among divergent strains (fig. 3F). The  
198 swept strains showed the largest drop of  $H_E$  in all the four swept regions (fig. 3F), which is  
199 consistent with low levels of genome-wide genetic diversity calculated for these strains using  
200 SNVs (Andersen et al. 2012; Crombie et al. 2019; Lee et al. 2021). Divergent strains showed  
201 higher diversity across the genome than swept strains and no signatures of selective sweeps  
202 (fig. 3F). Altogether, these results suggested that the diversity of STRs in *C. elegans* has been  
203 reduced in many strains by the selective sweeps, and divergent strains have retained high  
204 levels of STR diversity.

205 We further examined pSTR diversity in different genomic features and found that CDS  
206 had significantly lower  $H_E$  than any other genomic features, indicating reduced pSTR diversity  
207 in these regions (supplementary fig. S5A, supplementary table S2). In addition to lower  $H_E$ ,  
208 pSTRs in CDS regions also had significantly lower variance in repeat number than most other  
209 genomic regions (supplementary fig. S5B, supplementary table S2), suggesting pSTR expansion  
210 and contraction might be limited in CDS regions. Increased slippage rates and STR instability  
211 were linked to high AT content rather than high GC content (Schlötterer and Tautz 1992;  
212 Brandström and Ellegren 2008). We observed the highest GC content among pSTRs in CDS  
213 regions (supplementary fig. S5C, supplementary table S2). Altogether, these results suggested  
214 that STR diversity was constrained in the conservative CDS regions to maintain proper gene  
215 function.

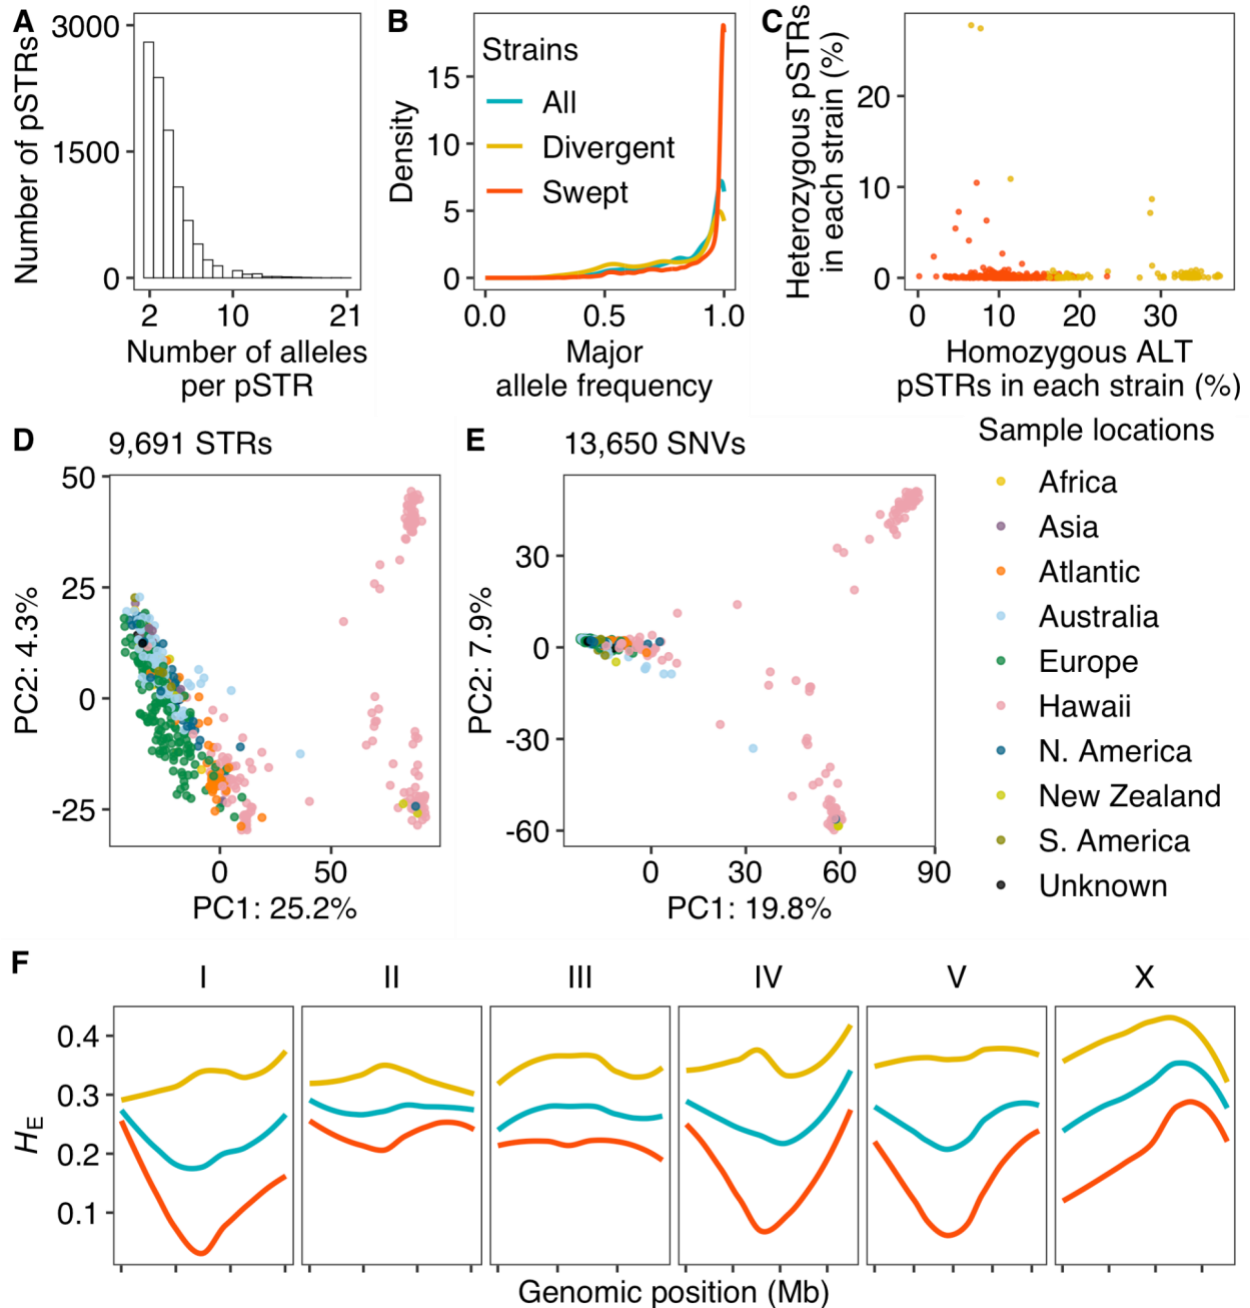

216

217 **FIG. 3.**

218 Genetic diversity of *C. elegans* STRs. (A) The distribution of allele counts per polymorphic  
 219 STR. (B) Major allele frequencies of all pSTRs for all strains (in blue), divergent strains (in  
 220 yellow), and swept strains (in red) are shown. (C) The percentage of pSTRs with heterozygous  
 221 alleles is plotted against the percentage of pSTRs with homozygous alternative (ALT) alleles  
 222 for each of the 540 strains. Divergent and swept strains are colored yellow and red,  
 223 respectively.

224 components analysis (PCA) of the genotype covariances using polymorphic STRs (*D*) and SNVs  
225 (*E*). Each dot represents a strain and is colored by the sampling location. (*F*) Chromosomal  
226 expected heterozygosity ( $H_E$ ) of pSTRs is shown as locally regressed lines for all strains (in  
227 blue), divergent strains (in yellow), and swept strains (in red). Tick marks on the x-axis denote  
228 every 5 Mb.  
229

### 230 STR mutation rates in MA lines

231 In addition to the selective sweeps, other exogenous and endogenous factors might also  
232 influence STR diversity in *C. elegans*. For example, because of ample bacterial food and a stable  
233 environment (Crombie et al. 2019), Hawaiian strains might have gone through more  
234 generations and fewer bottlenecks than European strains, which might have had to enter the  
235 dauer diapause stage more frequently to survive starvation and overwinter (Frézal and Félix  
236 2015). Therefore, Hawaiian strains might be able to accumulate more STR and other mutations  
237 than European strains. To better understand STR mutation and evolution in *C. elegans*, we  
238 examined STR variation in two mutation accumulation (MA) line panels that were derived  
239 from two strains, N2 and PB306 (Joyner-Matos et al. 2011; Matsuba et al. 2012; Saxena et al.  
240 2019; Rajaei et al. 2021): 1) N2 MA lines include 67 O1MA lines that were propagated for ~250  
241 generations, and 38 O2MA lines that were derived from eight selected O1MA lines with high  
242 and low fitness and were propagated for an additional ~150 generations; and 2) PB306 (a wild  
243 strain) MA lines include 67 O1MA lines that were propagated for ~250 generations. We called  
244 STR variants using the same methods as for wild strains. We identified 2,956 pSTRs with  
245 missing calls in less than 10% of all 172 MA lines and their two ancestors (supplementary fig.  
246 S6, supplementary table S3). The pSTRs of MA lines showed similar composition and  
247 enrichment features as pSTRs of our 540 wild strains (supplementary fig. S6).

248 O1MA lines in both MA line panels have undergone passage for about 250 generations  
249 with minimal selection (Joyner-Matos et al. 2011; Matsuba et al. 2012; Saxena et al. 2019; Rajaei  
250 et al. 2021). To investigate STR mutations in MA lines, we calculated mutation rates for total  
251 mutations and three different mutations (deletions, insertions, and substitutions) between the

252 ancestor and each O1MA line (ANC-O1MA) (See Materials and Methods) (fig. 4A-C). We  
253 found a significantly lower total mutation rate in O1MA lines derived from the N2 strain than  
254 from the PB306 strain (Wilcoxon test with  $p = 0.017$ ) (fig. 4A). Among different types of  
255 mutations, N2 O1MA lines showed significantly higher deletion rates but significantly lower  
256 substitution rates than PB306 O1MA lines, which were likely driven by mono-STRs (fig. 4B,  
257 fig. S7, supplementary table S2). Within each of the two O1MA line panels, we found the  
258 highest mutation rates in substitutions (fig. 4B, supplementary table S2). N2 O1MA lines  
259 showed significantly higher deletion rates than insertion rates, indicating more contractions  
260 than expansions, whereas PB306 O1MA lines showed significantly higher insertion rates than  
261 deletion rates (fig. 4B, supplementary table S2). Altogether, these results suggested that genetic  
262 variation between the N2 strain and the PB306 strain might affect STR mutation rates and  
263 types. Furthermore, we again found that the coding sequence (CDS) had significantly lower  
264 mutation rates than all other genomic features, except promoters (fig. 4C, supplementary table  
265 S2).

266         Although minimal selection was maintained during propagation from the N2 ancestor  
267 to its O1MA derivatives, lines with consistently high and consistently low fitness at about 250  
268 generations were selected as progenitors for O2MA lines (Matsuba et al. 2012; Saxena et al.  
269 2019). These O2MA lines allowed us to explore how initial fitness (or the initial genomic load  
270 of spontaneous deleterious mutations) affects the mutation process of STRs. As for ancestors  
271 and O1MA lines, we calculated STR mutation rates between each O1MA line and its O2MA  
272 line (O1MA-O2MA) (fig. 4D-F). We found a significantly higher total mutation rate in O2MA  
273 lines derived from high fitness O1MA lines than from low fitness O1MA lines (Wilcoxon test  
274 with  $p = 0.0056$ ) (fig. 4D). By contrast to ANC-O1MA, the difference in total mutation of  
275 O1MA-O2MA was primarily because of insertions rather than substitutions (fig. 4B, E,  
276 supplementary table S2). The insertion rates in both mono-STRs and di-STRs were  
277 significantly higher in O2MA lines derived from high fitness O1MA lines than from low fitness  
278 O1MA lines (fig. 4F, supplementary table S2), whereas deletion rates and substitutions rates

279 using all STRs, mono-STRs, and di-STRs showed no significant differences (fig. 4E, F,  
 280 supplementary table S2). Altogether, these results suggested which STR mutations might be  
 281 fitness-dependent, where high-fitness O1MA lines accumulated more STR insertions than  
 282 low-fitness O1MA lines.  
 283  
 284

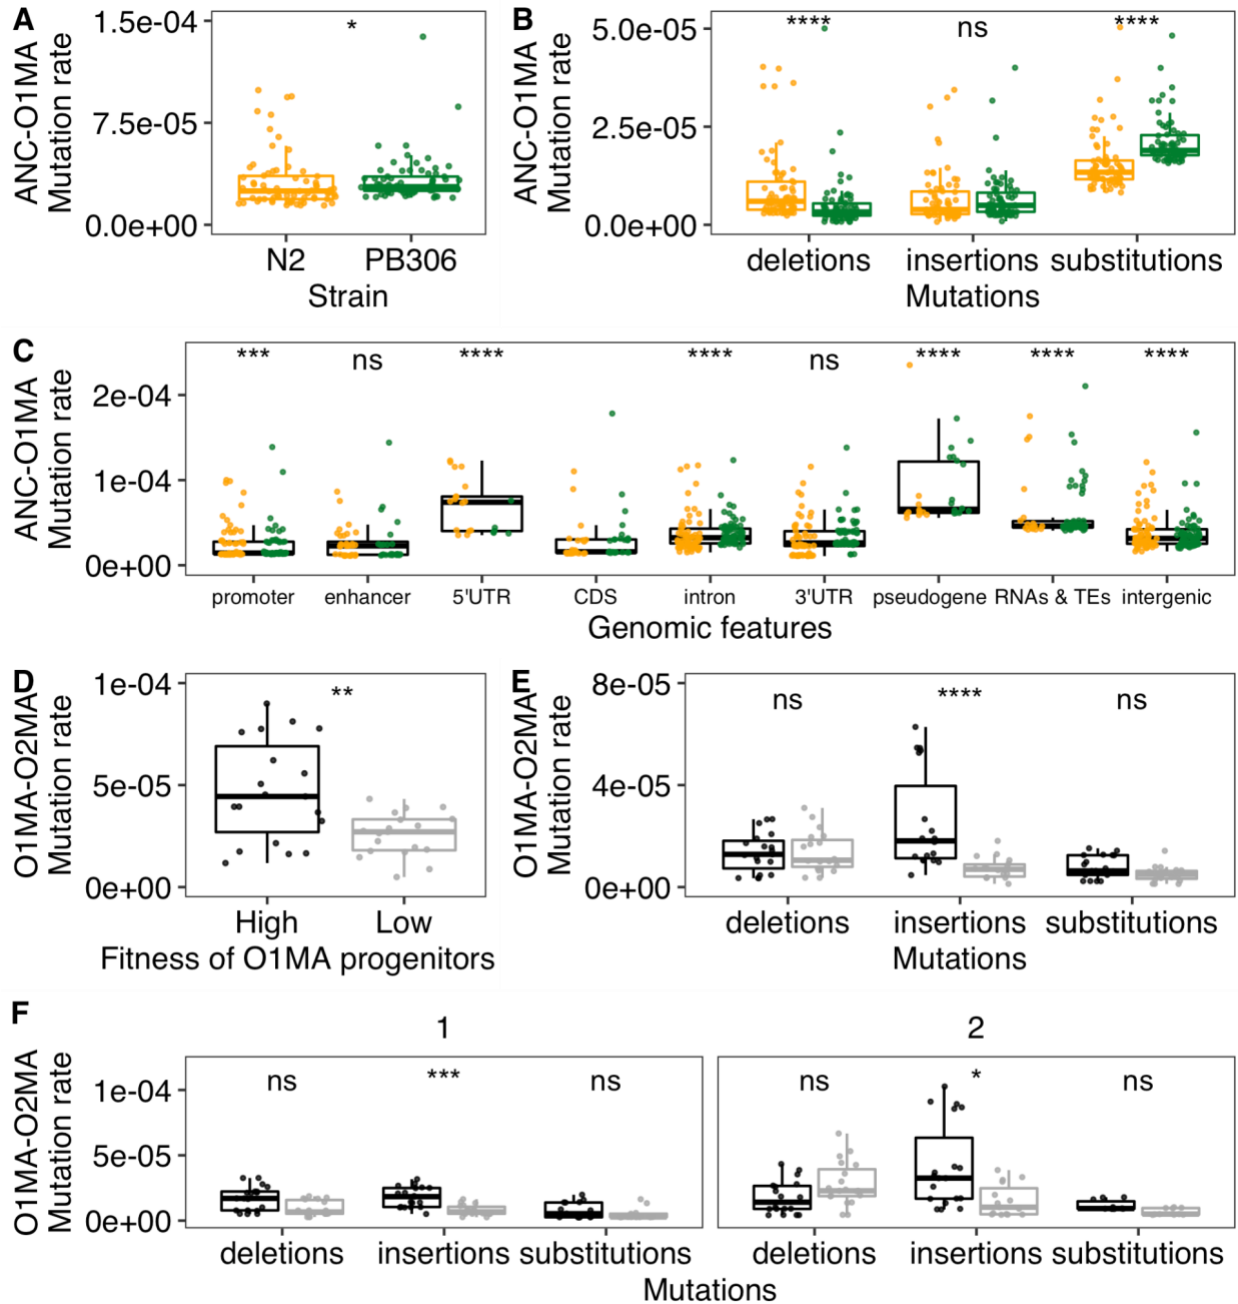

285

286

287 **FIG. 4.**

288 Mutation rates in MA lines. (A-B) Comparison of total STR mutation rates (A) and STR  
289 mutation rates of deletions, insertions, and substitutions (B) between O1MA lines derived from  
290 N2 (orange) and PB306 (green). (C) Comparison of STR mutation rates in CDS regions and  
291 other regions using both N2 (orange) and PB306 (green) O1MA lines. (D-F) Comparisons of  
292 total STR mutation rates (D) and STR mutation rates of deletions, insertions, and substitutions  
293 using all pSTRs (E), or mono-STRs and di-STRs (F) between O2MA lines that were derived  
294 from N2 O1MA progenitors with high (black) and low (gray) fitness. Each dot represents the  
295 mutation rate between the ancestor strain (ANC) and one of O1MA lines (ANC-O1MA) or  
296 between one of the eight N2 O1MA lines and one of its derived O2MA lines (38 in total)  
297 (O1MA-O2MA). Statistical significance of difference comparisons (supplementary table S2)  
298 was calculated using the two-sided Wilcoxon test and  $p$ -values were adjusted for multiple  
299 comparisons (Bonferroni method). Significance of each comparison is shown above each  
300 comparison pair (ns: adjusted  $p > 0.05$ ; \*\*: adjusted  $p \leq 0.01$ ; \*\*\*: adjusted  $p \leq 0.001$ ; \*\*\*\*: adjusted  
301  $p \leq 0.0001$ ).



## 302 Discussion

### 303 Natural variation in *C. elegans* STR mutations

304 STRs have long been recognized as one of the most variable classes of genomic  
305 variation. The polymorphisms in few STRs have previously been studied in a limited number  
306 of *C. elegans* strains worldwide and in local populations (Sivasundar and Hey 2003; Barrière  
307 and Félix 2005; Haber et al. 2005; Barrière and Félix 2007). Here, we characterized the  
308 distribution of 31,991 STRs with motif lengths of 1-6 bp in the reference genome of *C. elegans*  
309 and identified 9,691 polymorphic STRs across 540 genetically distinct wild strains. We found  
310 more STRs on chromosome arms than centers (supplementary fig. S1A), likely because  
311 recombination rates were higher on arms than centers (Rockman and Kruglyak 2009). Most  
312 pSTRs were multiallelic but had a predominant major allele (fig. 3A, B), which might be caused  
313 by the self-fertilizing reproductive mode and deepened by the recent selective sweeps.

314 As previously demonstrated in other species (Metzgar et al. 2000; Mirkin 2007), length  
315 variation caused by deletions or insertions was more common than substitutions among STR  
316 mutations in *C. elegans* (fig. 2A). We found significantly more STR contraction than expansion  
317 (fig. 2B, C) when we compared wild strain genomes to the reference genome. The reference  
318 strain N2 was isolated from Bristol, England and was identified as a swept strain (Andersen et  
319 al. 2012). To understand the evolution of STRs in *C. elegans*, a more informative comparison  
320 might come from choosing a reference from strains that avoided selective sweeps and was  
321 isolated from regions nearby the species origins. For example, the Hawaiian strain XZ1516,  
322 which likely carries the most ancestral genotypes (Crombie et al. 2019; Ma et al. 2021), has  
323 contraction in 66% of the 2,400 pSTRs that showed length variation to the reference STRs.  
324 Therefore, STR expansion rather than contraction likely occurred from ancestors to  
325 descendants in *C. elegans* if we consider strains that might reflect the ancestral origin of the  
326 species.

327

### 328 Polymorphic STRs reflect species evolutionary history

329           The differences in SNV diversity across the genomes of wild strains revealed the  
330 species-wide selective sweeps and potential geographical origins of *C. elegans* (Andersen et al.  
331 2012; Crombie et al. 2019; Lee et al. 2021; Crombie et al. 2022). Our results in STR diversity  
332 across the *C. elegans* genome of the 540 wild strains agreed with previous discoveries using  
333 SNVs. STR diversity across the genome showed signatures of selective sweeps among the 357  
334 swept strains (fig. 3F) in similar genomic regions as previous results (Andersen et al. 2012). We  
335 found higher STR diversity in divergent strains than swept strains (fig. 3B, C). The divergence  
336 in STRs across wild strains corresponded to their geographic locations as revealed by SNVs (fig.  
337 3D, E). Altogether, these results suggest natural variation in STRs reflect the evolutionary  
338 history of *C. elegans*. Because of the higher mutation rates of STRs than SNVs, exploring STR  
339 polymorphisms could further help to better resolve demography and short-scale genealogy in  
340 population genetic studies.

341

#### 342 **The impacts of selection on STR variation**

343           The species-wide selective sweeps might have had significant influences on the STR  
344 diversity that we observed in the wild *C. elegans* strains (fig. 3). Additionally, purifying  
345 selection might have constrained motif lengths and mutations of STRs in CDS regions to  
346 maintain proper functions in wild strains (fig. 1D, E, supplementary fig. S3C, D, supplementary  
347 fig. S5). We also observed constrained STRs in CDS regions of MA lines (fig. 4C, supplementary  
348 fig. S6C, D), which in principle mostly experienced relaxed selection, indicating strong  
349 deleterious effects of STR variation on CDS functions. We found the highest mutation rates in  
350 substitutions of ANC-O1MA (fig. 4B) and in insertions of O1MA-O2MA (fig. 4E), which might  
351 be related to their different mutation loads in the progenitors, because the growth  
352 environment from the ancestor to O1MA and from O1MA to O2MA was essentially identical  
353 (Matsuba et al. 2012; Saxena et al. 2019). It would be interesting to investigate the mutation  
354 pattern in a narrow time range, for example, each 50 generations, to examine if mutation types

355 and rates are associated with the load of mutations accumulated in the background during the  
356 spontaneous mutational process.

357         Among O2MA lines, we also found fitness-dependent STR mutations (fig. 4D-F).  
358 O2MA lines derived from high fitness O1MA lines showed significantly higher insertion rates  
359 than those derived from low fitness O1MA lines (fig. 4E, F). The original study found the short  
360 indel mutation rate was significantly greater in the high fitness lines than in the low fitness  
361 lines (Saxena et al. 2019). The authors proposed that high fitness lines might have higher  
362 tolerance than low fitness lines to harbor more indels because of synergistic epistasis (Saxena  
363 et al. 2019), which might also explain the fitness-dependent STR mutation that we observed  
364 here. Expansion could decrease the stability of STRs and has been widely associated with  
365 human disease and trait defects (Mirkin 2007; Sureshkumar et al. 2009). Assuming expanded  
366 STRs are more likely to have deleterious effects on fitness than contracted STRs, high-fitness  
367 MA lines might be able to accumulate more expanded STRs than low fitness lines before being  
368 removed by selection. Future effects should measure the fitness of O2MA lines and examine  
369 the correlation between STR mutation rates and fitness.

## 370 **Materials and Methods**

### 371 ***C. elegans* genotype data**

372 We obtained the reference genome of *C. elegans* from WormBase (WS276) (Harris et al. 2020)  
373 and alignment of whole-genome sequence data in the BAM format of 540 wild *C. elegans*  
374 strains from CeNDR (20210121 release) (Andersen et al. 2012; Cook et al. 2017; Evans et al.  
375 2021). These BAM files were generated using *BWA* (Li and Durbin 2009) incorporated in the  
376 pipeline *alignment-nf* (<https://github.com/AndersenLab/alignment-nf>) (Cook et al. 2017). We  
377 also acquired the hard-filtered isotype variant call format (VCF) file (CeNDR 20210121 release)  
378 for SNVs among the 540 wild *C. elegans* strains (Cook et al. 2017).

379

### 380 **STR variant calling**

381 We built a STR reference from the *C. elegans* reference genome using *Tandem Repeats Finder*  
382 (*Benson 1999*) and the STR reference construction framework described in *HipSTR-references*  
383 (<https://github.com/HipSTR-Tool/HipSTR-references>) (Willems et al. 2017). Then, we called  
384 STR variants using BAM files of the 540 strains, the STR reference, and *HipSTR* (v0.6.2) in the  
385 *de novo* stutter estimation mode (Willems et al. 2017). We filtered the VCF of *HipSTR* output  
386 using the script *filter\_vcf.py* as recommended in *HipSTR* to have high-quality calls. In total,  
387 we found variation in 27,636 STRs among the 540 strains. We further filtered STR variants  
388 with equal or more than 10% missing data across all strains using *BCFtools* (v.1.9) (Li 2011)  
389 and came to 9,691 polymorphic STRs, which we used in downstream analyses.

390

### 391 **STR annotation and effect prediction**

392 We determined genomic regions of reference STRs according to the general feature format  
393 (GFF3) file from WormBase (WS276) (Harris et al. 2020) and prediction of promoters and

394 enhancers (Jänes et al. 2018). STRs with multiple annotated features were assigned to a single  
395 feature using the following priority: CDS > 5'UTR > 3'UTR > promoter > enhancer > intron >  
396 RNAs & TEs > intergenic regions. We further predicted the consequence of polymorphic STR  
397 variants using the *csq* function of *BCFtools* (v.1.12) (Li 2011) incorporated in the pipeline  
398 *annotation-nf*(<https://github.com/AndersenLab/annotation-nf>).

399

#### 400 **Expansion and contraction**

401 For each polymorphic STR with expanded and/or contracted alternative alleles, we calculated  
402 the Expansion score =  $[\max(\text{STR length}) - \text{median}(\text{STR length})] / \text{median}(\text{STR length})$  (Press et  
403 al. 2018) and/or the Contraction score =  $[\min(\text{STR length}) - \text{median}(\text{STR length})] / \text{median}(\text{STR}$   
404 length).

405

#### 406 **Classification of swept and divergent strains**

407 We acquired the sweep haplotype summary data of the 540 wild *C. elegans* strains from  
408 CeNDR (20210121 release) (Cook et al. 2017). We defined strains with greater than or equal  
409 to 30% of swept haplotype in any of the four chromosomes (I, IV, V, and X) as swept strains.  
410 Other strains were defined as divergent strains.

411

#### 412 **Principal components analysis (PCA)**

413 For STRs, because only eight polymorphic STRs have no missing data for all 540 strains, we  
414 imputed the genotype of the 9,691 polymorphic STRs for strains with missing data. For strains  
415 with homozygous alleles (*e.g.*, “0|0”, “1|1”, “2|2”), a single character (*e.g.*, “0”, “1”, “2”), was  
416 used to represent the genotype. For strains with heterozygous alleles (*e.g.*, “0|1”, “1|2”, “3|2”),  
417 we treated the genotypes as numeric values and chose the smaller one as the genotype (*e.g.*,

418 “0”, “1”, “2”). Then we imputed missing genotypes using the R package *missMDA* (v1.18) (Josse  
419 and Husson 2016). For SNVs, we used the hard-filtered isotype VCF (CeNDR 20210121  
420 release) and used *BCFtools* (Li 2011) to filter SNVs that had any missing genotype calls and  
421 those that were below the 5% minor allele frequency. We used *PLINK* v1.9 (Purcell et al. 2007;  
422 Chang et al. 2015) to prune the SNVs to 13,650 markers with a linkage disequilibrium  
423 threshold of  $r^2 < 0.8$ . Then, we used the generic function *prcomp()* in R (Core Team and Others  
424 2013) to perform principal components analysis for both STRs and SNVs.

425

## 426 **STR diversity**

427 We calculated expected heterozygosity ( $H_E$ ) (Nei 1973) for STR diversity using the following  
428 equation:

$$429 \quad H_E = 1 - \sum_i f_i^2$$

430 where the  $f_i$  denotes the allele frequency of the  $i$ th allele for a specific STR.

431

## 432 **STR variants in mutation accumulation (MA) lines**

433 We obtained whole-genome sequence data in the FASTQ format of 174 MA lines, including  
434 N2 MA lines: the N2 ancestor, 67 O1MA lines, and 38 O2MA lines; PB306 MA lines: the PB306  
435 ancestor and 67 O1MA lines (NCBI Short Read Archive projects PRJNA395568,  
436 PRJNA429972, and PRJNA665851) (Saxena et al. 2019; Rajaei et al. 2021). We used the  
437 pipelines *trim-fq-nf* (<https://github.com/AndersenLab/trim-fq-nf>) and *alignment-nf* to trim  
438 raw FASTQ files and generate BAM files for each line, respectively. We called STR variants  
439 for the 174 lines as described above and identified 2,956 pSTRs with missing calls in less than  
440 10% of all strains.

441

## 442 Mutation rate of polymorphic STRs in MA lines

443 We calculated the STR mutation rate in MA lines using their 2,956 pSTRs. For each O1MA  
444 line and the ancestor, we selected STR sites with data in both lines. Then, we compared the  
445 two alleles of each STR in the O1MA line to the two alleles in the ancestor, respectively, to  
446 identify insertion, deletion, substitution, or no mutation. We also obtained the number of  
447 generations between the O1MA line and the ancestor from the original studies (Saxena et al.  
448 2019; Rajaei et al. 2021). The mutation rate (per-allele, per-STR, per-generation)  $\mu$  for each  
449 type of mutation was calculated as  $m/2nt$  where  $m$  is the number of the mutation,  $n$  is the total  
450 number of STR sites between the two lines, and  $t$  is the number of generations. We calculated  
451 the mutation rate of the three different mutations for each N2 O2MA line to its ancestral N2  
452 O1MA line using the same method.

453

## 454 Statistical analysis

455 Statistical significance of difference comparisons was calculated using the Wilcoxon test and  
456  $p$ -values were adjusted for multiple comparisons (Bonferroni method) using the  
457 `compare_means()` function in the R package `ggpubr` (v0.2.4)  
458 (<https://github.com/kassambara/ggpubr/>). Enrichment analyses were performed using the one-  
459 sided Fisher's exact test and were corrected for multiple comparisons (Bonferroni method).

460

461

## 462 **Acknowledgments**

463 We would like to thank Timothy A. Crombie and Ryan McKeown for helpful comments on  
464 the manuscript. We would also like to thank WormBase because without it these analyses  
465 would not have been possible. G.Z. is supported by the NSF-Simons Center for Quantitative  
466 Biology at Northwestern University (awards Simons Foundation/SFARI 597491-RWC and the  
467 National Science Foundation 1764421). Y.W. was supported as a joint PhD student by China  
468 Scholarship Council (No. 201706910052). E.C.A. is supported by a grant from the National  
469 Institutes of Health R01 DK115690. The *C. elegans* Natural Diversity Resource is supported by  
470 a National Science Foundation Living Collections Award to E.C.A. (1930382).

## 471 **Author contributions**

472 E.C.A. conceived of and designed the study. G.Z. and Y.W. analyzed the data. G.Z., Y.W., and  
473 E.C.A. wrote the manuscript.

## 474 **Competing Interests**

475 The authors declare no competing interests.

## 476 **Data availability**

477 The STR variant calling pipeline can be found at <https://github.com/AndersenLab/wi-STRs>.  
478 The datasets and code for generating all figures can be found at  
479 <https://github.com/AndersenLab/WI-Ce-STRs>.

## 480 **References**

- 481 Andersen EC, Gerke JP, Shapiro JA, Crissman JR, Ghosh R, Bloom JS, Félix M-A, Kruglyak L. 2012.  
482 Chromosome-scale selective sweeps shape *Caenorhabditis elegans* genomic diversity. *Nat. Genet.*  
483 44:285–290.
- 484 Barrière A, Félix M-A. 2005. High local genetic diversity and low outcrossing rate in *Caenorhabditis*



- 485           elegans natural populations. *Curr. Biol.* 15:1176–1184.
- 486   Barrière A, Félix M-A. 2007. Temporal dynamics and linkage disequilibrium in natural  
487           Caenorhabditis elegans populations. *Genetics* 176:999–1011.
- 488   Benson G. 1999. Tandem repeats finder: a program to analyze DNA sequences. *Nucleic Acids Res.*  
489           27:573–580.
- 490   Brandström M, Ellegren H. 2008. Genome-wide analysis of microsatellite polymorphism in chicken  
491           circumventing the ascertainment bias. *Genome Res.* 18:881–887.
- 492   Brenner S. 1974. The genetics of Caenorhabditis elegans. *Genetics* 77:71–94.
- 493   Chang CC, Chow CC, Tellier LC, Vattikuti S, Purcell SM, Lee JJ. 2015. Second-generation PLINK:  
494           rising to the challenge of larger and richer datasets. *Gigascience* 4:7.
- 495   Cook DE, Zdraljevic S, Roberts JP, Andersen EC. 2017. CeNDR, the Caenorhabditis elegans natural  
496           diversity resource. *Nucleic Acids Res.* 45:D650–D657.
- 497   Core Team R, Others. 2013. R: A language and environment for statistical computing. Vienna,  
498           Austria: R Foundation for Statistical Computing. *Available*.
- 499   Crombie TA, Battlay P, Tanny RE, Evans KS, Buchanan CM, Cook DE, Dilks CM, Stinson LA,  
500           Zdraljevic S, Zhang G, et al. 2022. Local adaptation and spatiotemporal patterns of genetic  
501           diversity revealed by repeated sampling of Caenorhabditis elegans across the Hawaiian Islands.  
502           *Mol. Ecol.* [Internet]. Available from: <https://onlinelibrary.wiley.com/doi/10.1111/mec.16400>
- 503   Crombie TA, Zdraljevic S, Cook DE, Tanny RE, Brady SC, Wang Y, Evans KS, Hahnel S, Lee D,  
504           Rodriguez BC, et al. 2019. Deep sampling of Hawaiian Caenorhabditis elegans reveals high  
505           genetic diversity and admixture with global populations. *Elife* 8:e50465.
- 506   Denver DR, Morris K, Kewalramani A, Harris KE, Chow A, Estes S, Lynch M, Thomas WK. 2004.  
507           Abundance, distribution, and mutation rates of homopolymeric nucleotide runs in the genome  
508           of Caenorhabditis elegans. *J. Mol. Evol.* 58:584–595.
- 509   Evans KS, van Wijk MH, McGrath PT, Andersen EC, Sterken MG. 2021. From QTL to gene: C.  
510           elegans facilitates discoveries of the genetic mechanisms underlying natural variation. *Trends*  
511           *Genet.* [Internet] 0. Available from: <http://www.cell.com/article/S0168952521001463/abstract>
- 512   Félix M-A, Duveau F. 2012. Population dynamics and habitat sharing of natural populations of  
513           Caenorhabditis elegans and C. briggsae. *BMC Biol.* 10:59.
- 514   Fotsing SF, Margoliash J, Wang C, Saini S, Yanicky R, Shleizer-Burko S, Goren A, Gymrek M. 2019.  
515           The impact of short tandem repeat variation on gene expression. *Nat. Genet.* 51:1652–1659.
- 516   Frézal L, Félix M-A. 2015. The natural history of model organisms: C. elegans outside the Petri dish.  
517           *Elife* 4:e05849.

- 518 Gemayel R, Vences MD, Legendre M, Verstrepen KJ. 2010. Variable tandem repeats accelerate  
519 evolution of coding and regulatory sequences. *Annu. Rev. Genet.* 44:445–477.
- 520 Gilbert KJ, Zdraljevic S, Cook DE, Cutter AD, Andersen EC, Baer CF. 2022. The distribution of  
521 mutational effects on fitness in *Caenorhabditis elegans* inferred from standing genetic variation.  
522 *Genetics* [Internet] 220. Available from: <http://dx.doi.org/10.1093/genetics/iyab166>
- 523 Gymrek M. 2017. A genomic view of short tandem repeats. *Curr. Opin. Genet. Dev.* 44:9–16.
- 524 Gymrek M, Willems T, Reich D, Erlich Y. 2017. Interpreting short tandem repeat variations in  
525 humans using mutational constraint. *Nat. Genet.* 49:1495–1501.
- 526 Haber M, Schüngel M, Putz A, Müller S, Hasert B, Schulenburg H. 2005. Evolutionary history of  
527 *Caenorhabditis elegans* inferred from microsatellites: evidence for spatial and temporal genetic  
528 differentiation and the occurrence of outbreeding. *Mol. Biol. Evol.* 22:160–173.
- 529 Hannan AJ. 2018. Tandem repeats mediating genetic plasticity in health and disease. *Nat. Rev. Genet.*  
530 19:286–298.
- 531 Harris TW, Arnaboldi V, Cain S, Chan J, Chen WJ, Cho J, Davis P, Gao S, Grove CA, Kishore R, et al.  
532 2020. WormBase: a modern Model Organism Information Resource. *Nucleic Acids Res.*  
533 48:D762–D767.
- 534 Jakubosky D, D’Antonio M, Bonder MJ, Smail C, Donovan MKR, Young Greenwald WW, Matsui H,  
535 i2QTL Consortium, D’Antonio-Chronowska A, Stegle O, et al. 2020. Properties of structural  
536 variants and short tandem repeats associated with gene expression and complex traits. *Nat.*  
537 *Commun.* 11:2927.
- 538 Jänes J, Dong Y, Schoof M, Serizay J, Appert A, Cerrato C, Woodbury C, Chen R, Gemma C, Huang  
539 N, et al. 2018. Chromatin accessibility dynamics across *C. elegans* development and ageing. *Elife*  
540 [Internet] 7. Available from: <http://dx.doi.org/10.7554/eLife.37344>
- 541 Josse J, Husson F. 2016. missMDA: A Package for Handling Missing Values in Multivariate Data  
542 Analysis. *J. Stat. Softw.* 70:1–31.
- 543 Joyner-Matos J, Bean LC, Richardson HL, Sammeli T, Baer CF. 2011. No evidence of elevated  
544 germline mutation accumulation under oxidative stress in *Caenorhabditis elegans*. *Genetics*  
545 189:1439–1447.
- 546 Kiontke KC, Félix M-A, Ailion M, Rockman MV, Braendle C, Pénigault J-B, Fitch DHA. 2011. A  
547 phylogeny and molecular barcodes for *Caenorhabditis*, with numerous new species from rotting  
548 fruits. *BMC Evol. Biol.* 11:339.
- 549 Kunkel TA. 1993. Nucleotide repeats. Slippery DNA and diseases. *Nature* 365:207–208.
- 550 Lee D, Zdraljevic S, Stevens L, Wang Y, Tanny RE, Crombie TA, Cook DE, Webster AK, Chirakar R,  
551 Baugh LR, et al. 2021. Balancing selection maintains hyper-divergent haplotypes in

- 552 Caenorhabditis elegans. *Nat Ecol Evol* 5:794–807.
- 553 Legendre M, Pochet N, Pak T, Verstrepen KJ. 2007. Sequence-based estimation of minisatellite and  
554 microsatellite repeat variability. *Genome Res.* 17:1787–1796.
- 555 Li H. 2011. A statistical framework for SNP calling, mutation discovery, association mapping and  
556 population genetical parameter estimation from sequencing data. *Bioinformatics* 27:2987–2993.
- 557 Li H, Durbin R. 2009. Fast and accurate short read alignment with Burrows-Wheeler transform.  
558 *Bioinformatics* 25:1754–1760.
- 559 Lynch M. 2010. Rate, molecular spectrum, and consequences of human mutation. *Proc. Natl. Acad.*  
560 *Sci. U. S. A.* 107:961–968.
- 561 Ma F, Lau CY, Zheng C. 2021. Large genetic diversity and strong positive selection in F-box and  
562 GPCR genes among the wild isolates of *Caenorhabditis elegans*. *Genome Biol. Evol.* [Internet]  
563 13. Available from: <http://dx.doi.org/10.1093/gbe/evab048>
- 564 Malik I, Kelley CP, Wang ET, Todd PK. 2021. Molecular mechanisms underlying nucleotide repeat  
565 expansion disorders. *Nat. Rev. Mol. Cell Biol.* 22:589–607.
- 566 Matsuba C, Lewis S, Ostrow DG, Salomon MP, Sylvestre L, Tabman B, Ungvari-Martin J, Baer CF.  
567 2012. Invariance (?) of mutational parameters for relative fitness over 400 generations of  
568 mutation accumulation in *Caenorhabditis elegans*. *G3* 2:1497–1503.
- 569 Metzgar D, Bytof J, Wills C. 2000. Selection against frameshift mutations limits microsatellite  
570 expansion in coding DNA. *Genome Res.* 10:72–80.
- 571 Mirkin SM. 2007. Expandable DNA repeats and human disease. *Nature* 447:932–940.
- 572 Nei M. 1973. Analysis of gene diversity in subdivided populations. *Proc. Natl. Acad. Sci. U. S. A.*  
573 70:3321–3323.
- 574 Press MO, McCoy RC, Hall AN, Akey JM, Queitsch C. 2018. Massive variation of short tandem  
575 repeats with functional consequences across strains of *Arabidopsis thaliana*. *Genome Res.*  
576 28:1169–1178.
- 577 Price AL, Patterson NJ, Plenge RM, Weinblatt ME, Shadick NA, Reich D. 2006. Principal  
578 components analysis corrects for stratification in genome-wide association studies. *Nat. Genet.*  
579 38:904–909.
- 580 Purcell S, Neale B, Todd-Brown K, Thomas L, Ferreira MAR, Bender D, Maller J, Sklar P, de Bakker  
581 PIW, Daly MJ, et al. 2007. PLINK: a tool set for whole-genome association and population-based  
582 linkage analyses. *Am. J. Hum. Genet.* 81:559–575.
- 583 Rajaei M, Saxena AS, Johnson LM, Snyder MC, Crombie TA, Tanny RE, Andersen EC, Joyner-Matos  
584 J, Baer CF. 2021. Mutability of mononucleotide repeats, not oxidative stress, explains the  
585 discrepancy between laboratory-accumulated mutations and the natural allele-frequency

- 586 spectrum in *C. elegans*. *Genome Res.* 31:1602–1613.
- 587 Reinart WB, Lalun VO, Reitan T, Jakobsen KS, Butenko MA. 2021. Length variation in short tandem  
588 repeats affects gene expression in natural populations of *Arabidopsis thaliana*. *Plant Cell*  
589 33:2221–2234.
- 590 Rockman MV, Kruglyak L. 2009. Recombinational landscape and population genomics of  
591 *Caenorhabditis elegans*. *PLoS Genet.* 5:e1000419.
- 592 Saxena AS, Salomon MP, Matsuba C, Yeh S-D, Baer CF. 2019. Evolution of the Mutational Process  
593 under Relaxed Selection in *Caenorhabditis elegans*. *Mol. Biol. Evol.* 36:239–251.
- 594 Schlotterer C, Tautz D. 1992. Slippage synthesis of simple sequence DNA. *Nucleic Acids Res.* 20:211–  
595 215.
- 596 Sivasundar A, Hey J. 2003. Population genetics of *Caenorhabditis elegans*: the paradox of low  
597 polymorphism in a widespread species. *Genetics* 163:147–157.
- 598 Snoek BL, Sterken MG, Hartanto M, van Zuilichem A-J, Kammenga JE, de Ridder D, Nijveen H.  
599 2020. WormQTL2: an interactive platform for systems genetics in *Caenorhabditis elegans*.  
600 *Database* [Internet] 2020. Available from: <http://dx.doi.org/10.1093/database/baz149>
- 601 Sun JX, Helgason A, Masson G, Ebenesersdóttir SS, Li H, Mallick S, Gnerre S, Patterson N, Kong A,  
602 Reich D, et al. 2012. A direct characterization of human mutation based on microsatellites. *Nat.*  
603 *Genet.* 44:1161–1165.
- 604 Sureshkumar S, Todesco M, Schneeberger K, Harilal R, Balasubramanian S, Weigel D. 2009. A genetic  
605 defect caused by a triplet repeat expansion in *Arabidopsis thaliana*. *Science* 323:1060–1063.
- 606 Tóth G, Gáspári Z, Jurka J. 2000. Microsatellites in different eukaryotic genomes: survey and analysis.  
607 *Genome Res.* 10:967–981.
- 608 Widmayer SJ, Evans KS, Zdraljevic S, Andersen EC. 2022. Evaluating the power and limitations of  
609 genome-wide association studies in *C. elegans*. *G3* [Internet]. Available from:  
610 <http://dx.doi.org/10.1093/g3journal/jkac114>
- 611 Willems T, Gymrek M, Poznik GD, Tyler-Smith C, 1000 Genomes Project Chromosome Y Group,  
612 Erlich Y. 2016. Population-Scale Sequencing Data Enable Precise Estimates of Y-STR Mutation  
613 Rates. *Am. J. Hum. Genet.* 98:919–933.
- 614 Willems T, Zielinski D, Yuan J, Gordon A, Gymrek M, Erlich Y. 2017. Genome-wide profiling of  
615 heritable and de novo STR variations. *Nat. Methods* 14:590–592.
- 616 Ying M, Qiao Y, Yu L. 2016. Evolutionary expansion of nematode-specific glycine-rich secreted  
617 peptides. *Gene* 587:76–82.
- 618 Zhang G, Mostad JD, Andersen EC. 2021. Natural variation in fecundity is correlated with species-  
619 wide levels of divergence in *Caenorhabditis elegans*. *G3* [Internet]. Available from:

620 <http://dx.doi.org/10.1093/g3journal/jkab168>

621 Zhang G, Roberto NM, Lee D, Hahnel SR, Andersen EC. 2022. The impact of species-wide gene  
622 expression variation on *Caenorhabditis elegans* complex traits. *Nat. Commun.* 13:1–13.

623

624

## Supplementary material

625

### Natural variation in *C. elegans* short tandem repeats

626

627

Gaotian Zhang<sup>1</sup>, Ye Wang<sup>1</sup>, and Erik C. Andersen<sup>1,\*</sup>

628

629 1. Department of Molecular Biosciences, Northwestern University, Evanston, IL 60208, USA

630 \*Corresponding author. E-mail: [erik.andersen@northwestern.edu](mailto:erik.andersen@northwestern.edu) (E.C.A.)

631

632

633 **The PDF file includes:**

634

635 Figs. S1 to S7

636 Legends for Tables S1 to S3

637

638

639 **Other Supplementary Material for this manuscript includes the following:**

640

641

Tables S1 to S3

642 **Supplementary Figures**

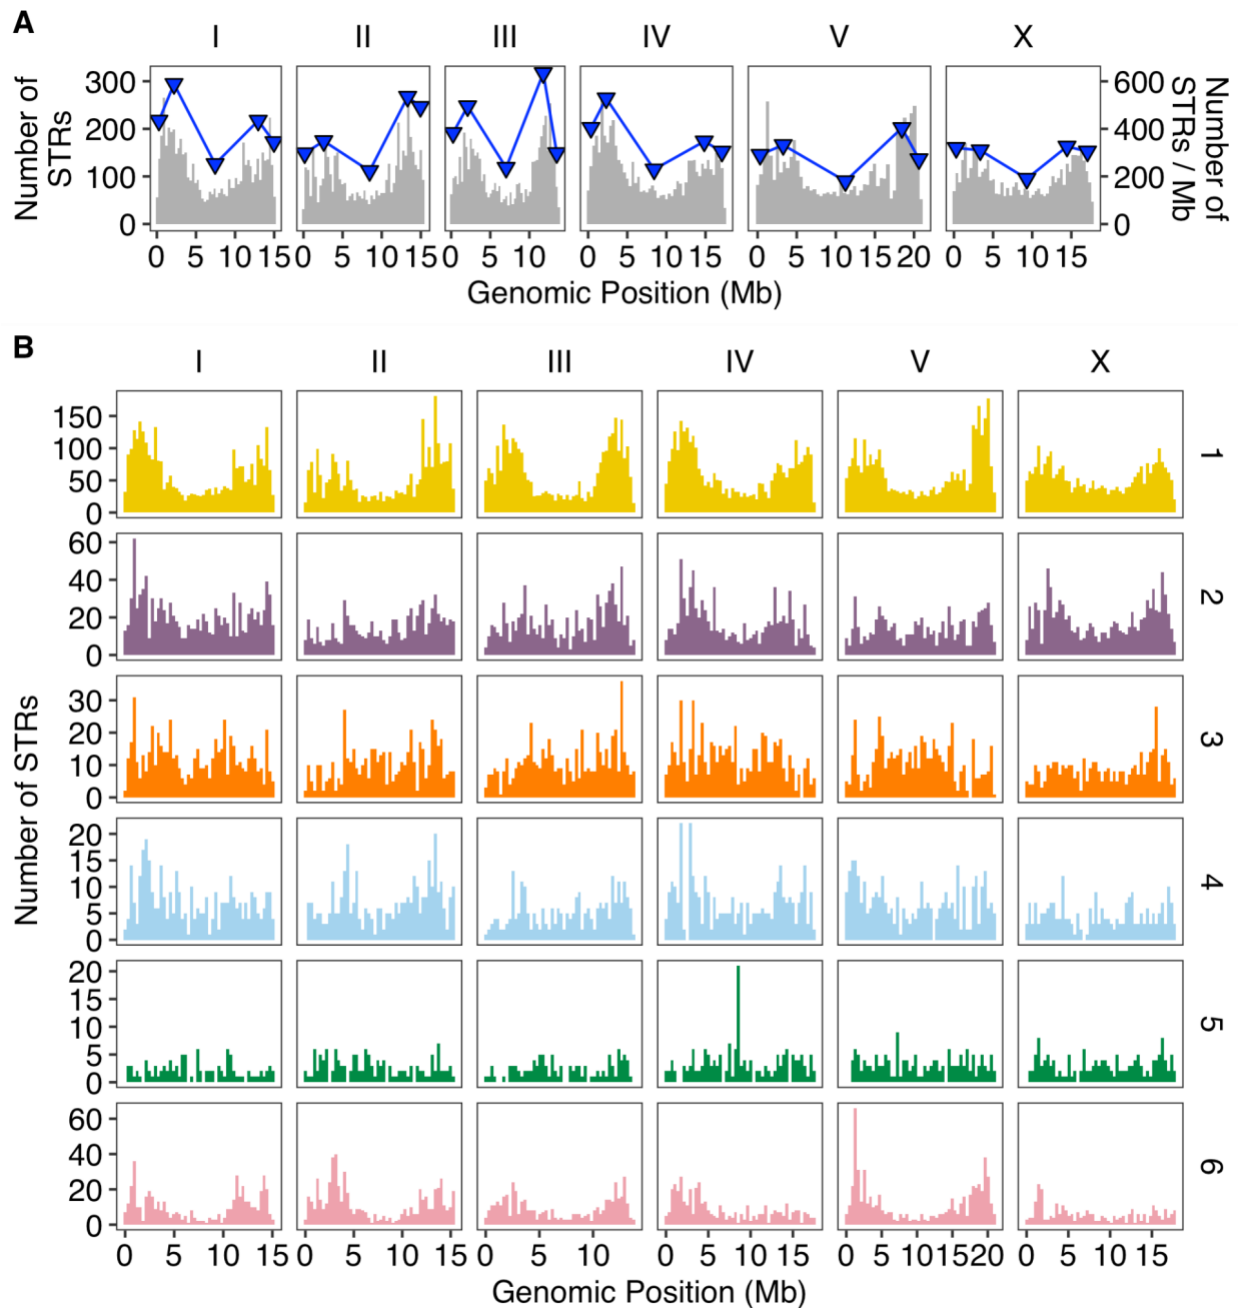

643

644 **Fig. S1**

645 The distribution of reference STRs across *C. elegans*. (A) The distribution of reference STRs in  
646 the *C. elegans* genome. Blue triangles represent the number of STRs per Mb in different  
647 genomic domains (tips, arms, and centers) (Rockman and Kruglyak 2009). (B) The distribution  
648 of reference STRs with different motif lengths in the *C. elegans* genome.

649

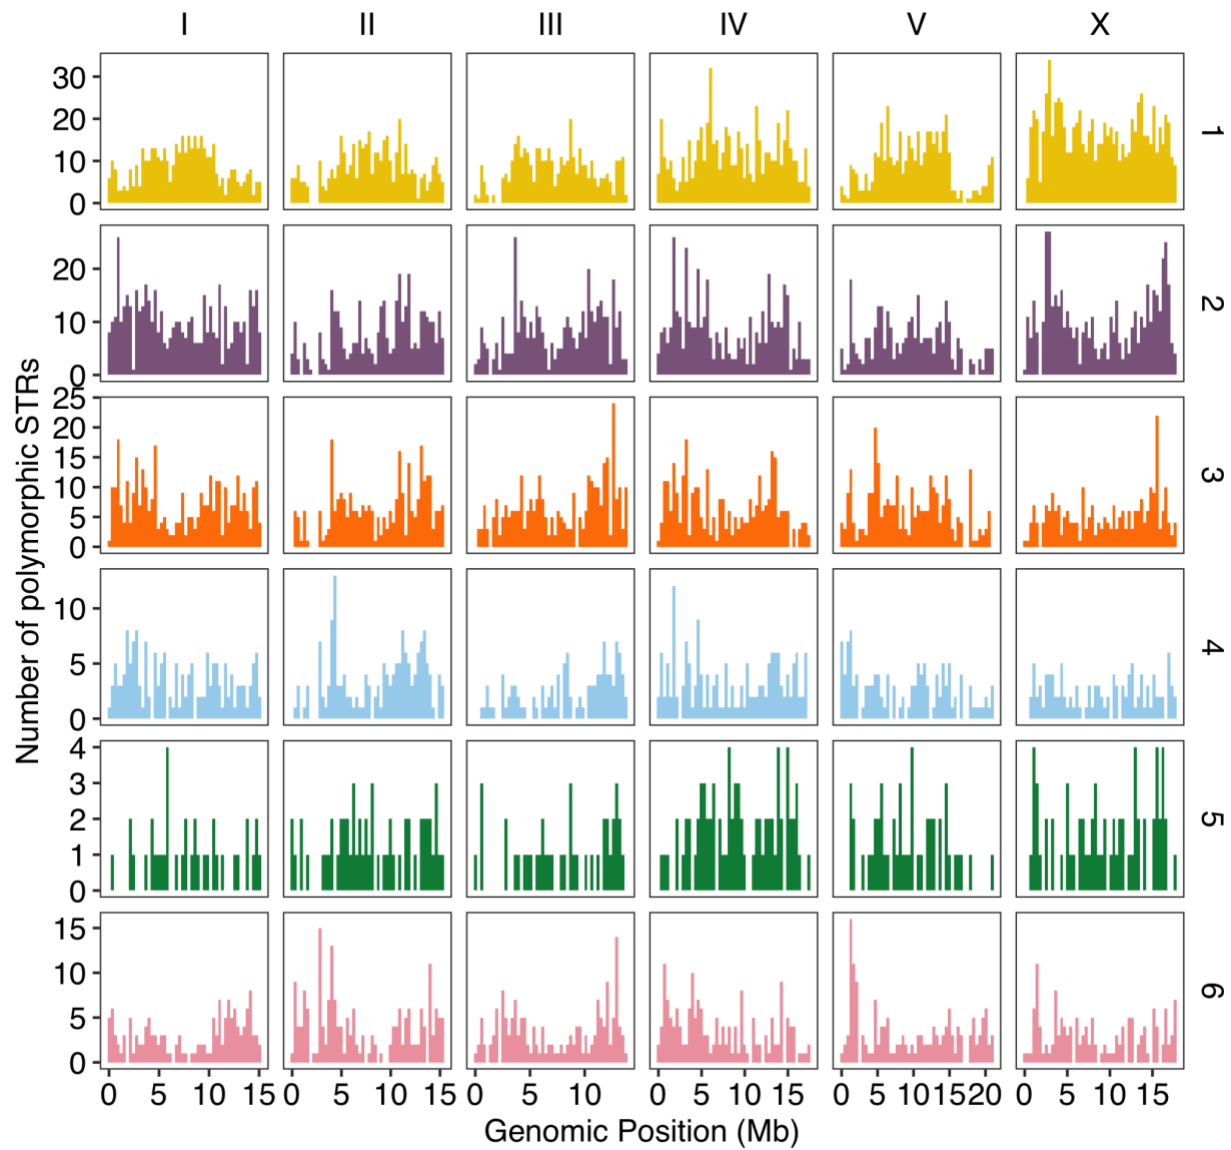

650

651 **Fig. S2**

652 The distribution of polymorphic STRs with different motif lengths in the *C. elegans* genome.

653



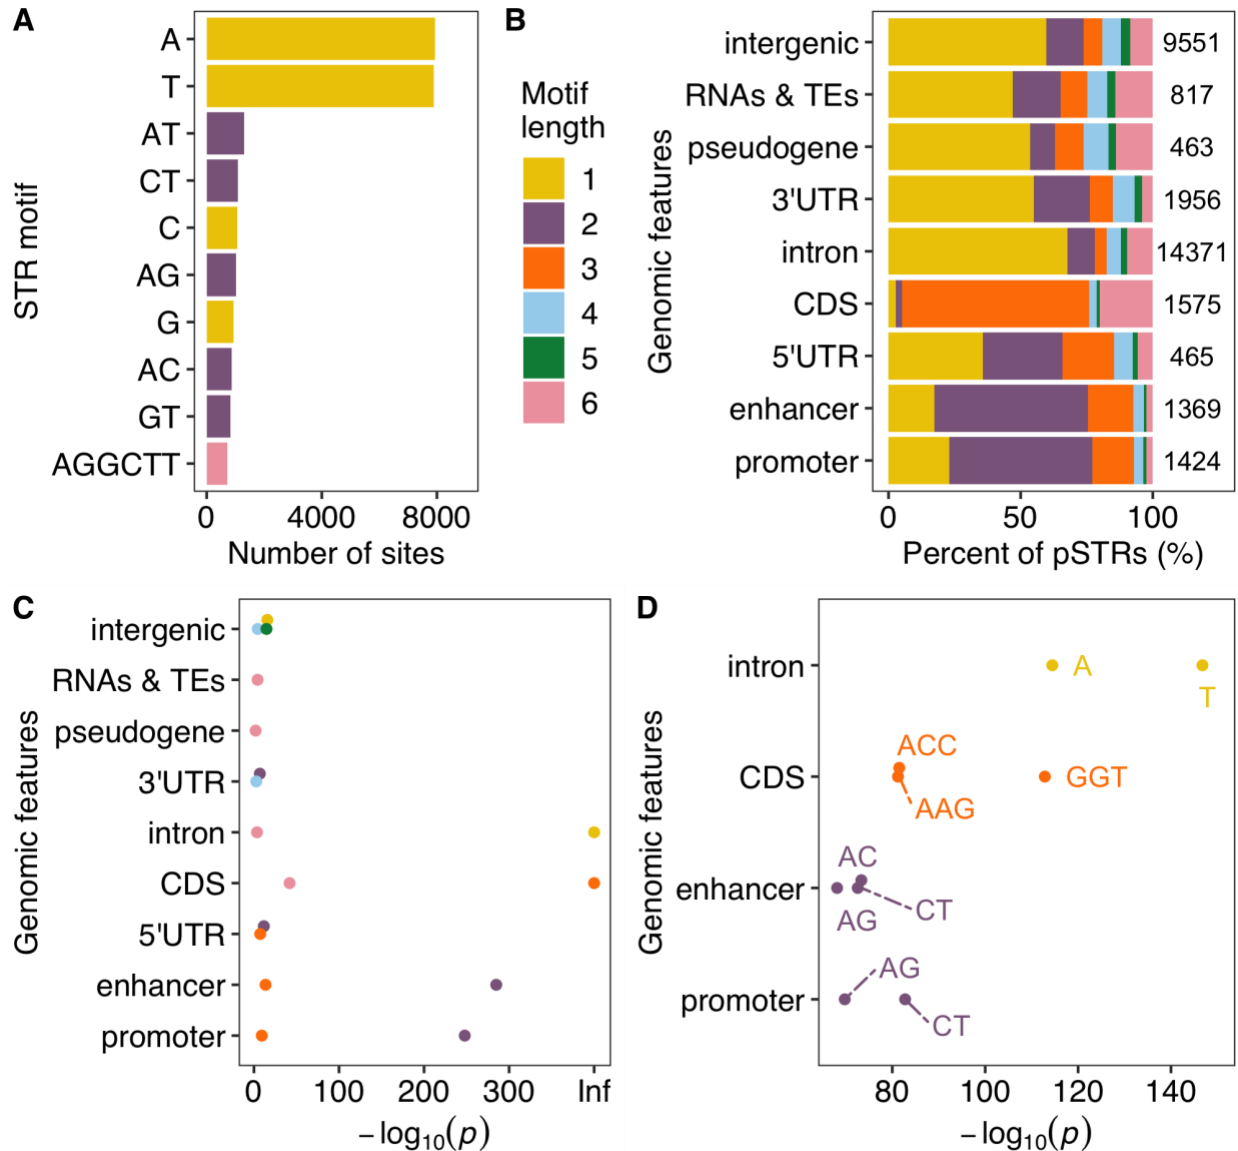

654

655 **Fig. S3**

656 Motifs and genomic features of reference STRs in *C. elegans*. (A) The top ten most frequent  
 657 motif sequences in reference STRs are shown on the y-axis, and the number of those sites on  
 658 the x-axis. (B) Percent of reference STRs with different motif lengths in each genomic feature.  
 659 The total number of reference STRs in each genomic feature is indicated. (C) Enriched STRs  
 660 with different motif lengths (colored as in (B)) in different genomic features are shown. (D)  
 661 The top 10 most enriched STR motif sequences (labeled) in different genomic features are  
 662 shown. Statistical significance (supplementary table S2) for enrichment tests was calculated  
 663 using the one-side Fisher's exact test and was corrected for multiple comparisons (Bonferroni  
 664 method).  
 665

666

667

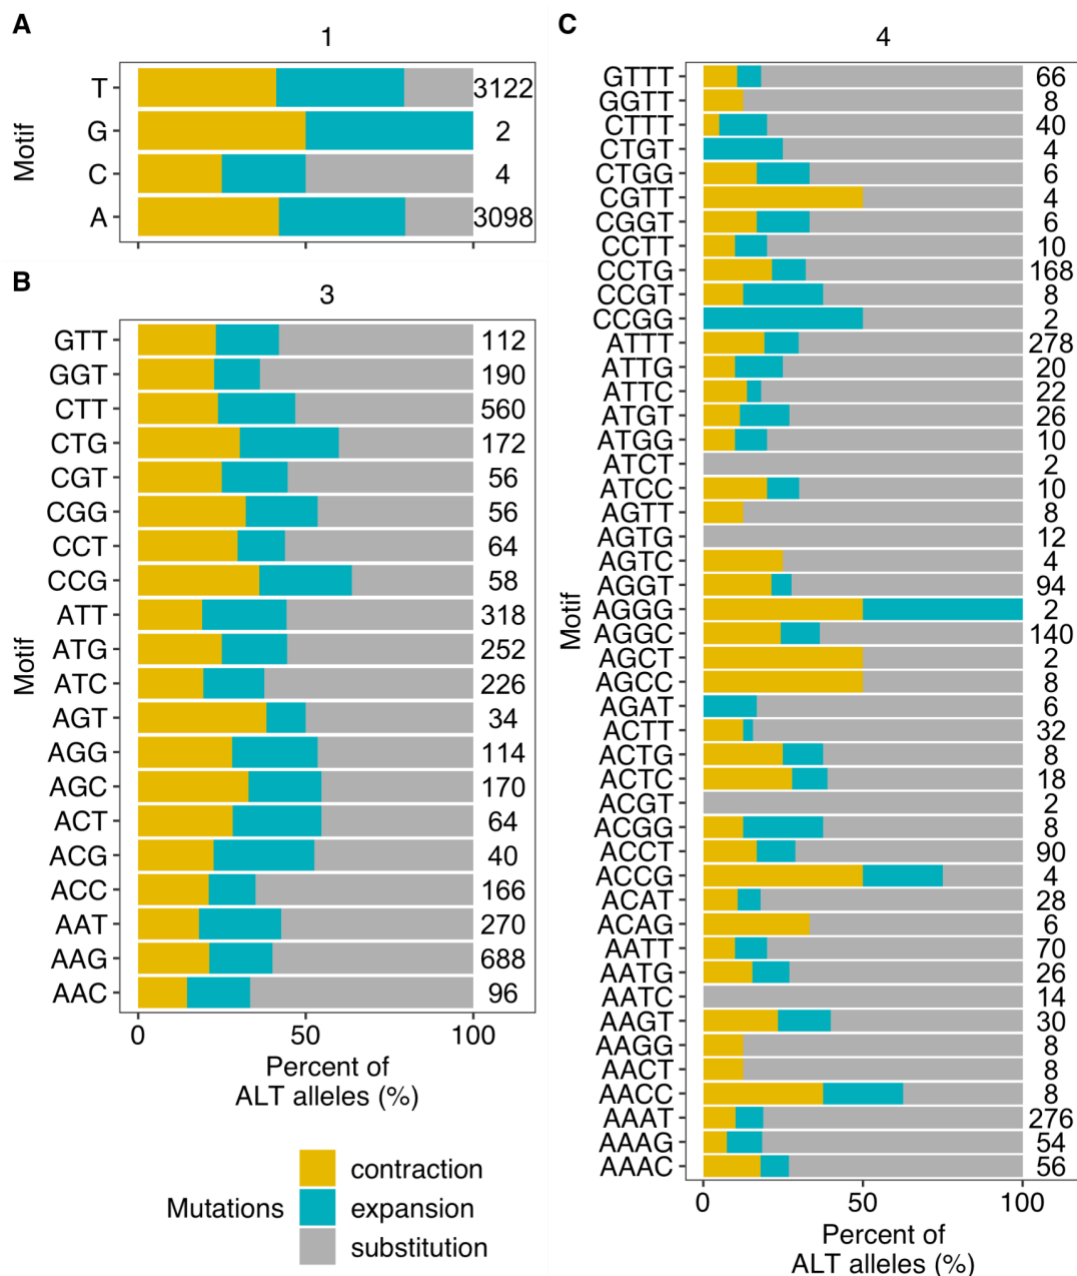

668

669 **Fig. S4**

670 Percent of alternative alleles showing contraction, expansion, or substitution in mono-STRs  
 671 (A), tri-STRs (B), and tetra-STRs (C). The total number of STRs with different motifs is  
 672 indicated on the right.

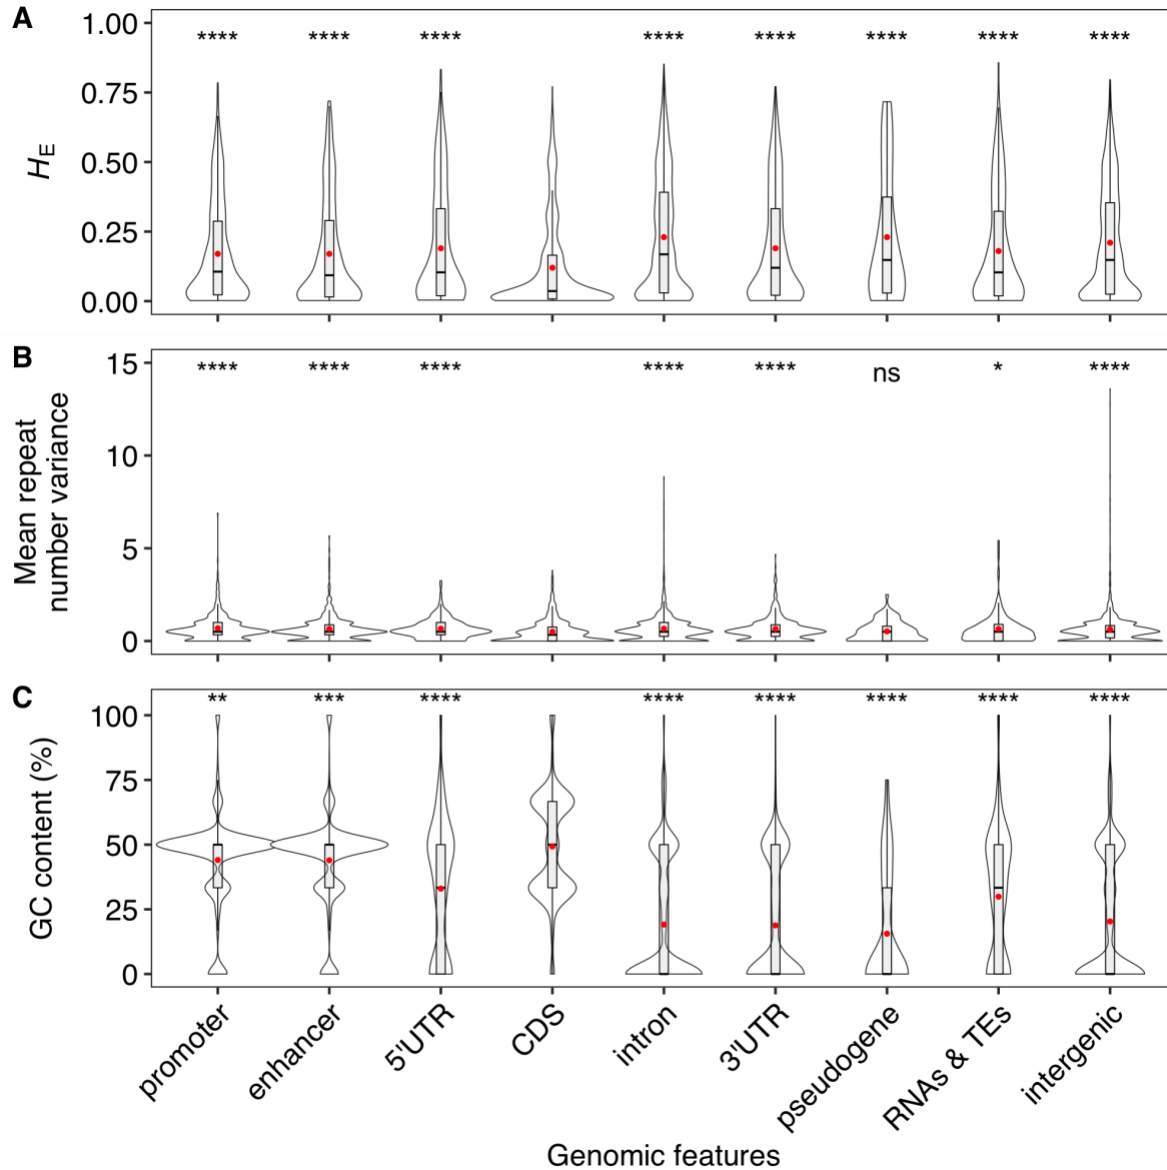

673

674 **Fig. S5**

675 Mutations of STRs in CDS regions are constrained. Comparisons of expected heterozygosity  
676 ( $H_E$ ) (A), mean repeat number variance of each STRs (B), and motif GC content (C) between  
677 polymorphic STRs in CDS regions and other regions. Red dots indicate mean values of each  
678 estimate in each region. Statistical significance (supplementary table S2) was calculated using  
679 the two-sided Wilcoxon test and was corrected for multiple comparisons (Bonferroni method).  
680 Significance of each comparison is shown above (ns: adjusted  $p > 0.05$ ; \*: adjusted  $p \leq 0.05$ ; \*\*:  
681 adjusted  $p \leq 0.01$ ; \*\*\*: adjusted  $p \leq 0.001$ ; \*\*\*\*: adjusted  $p \leq 0.0001$ ).

682

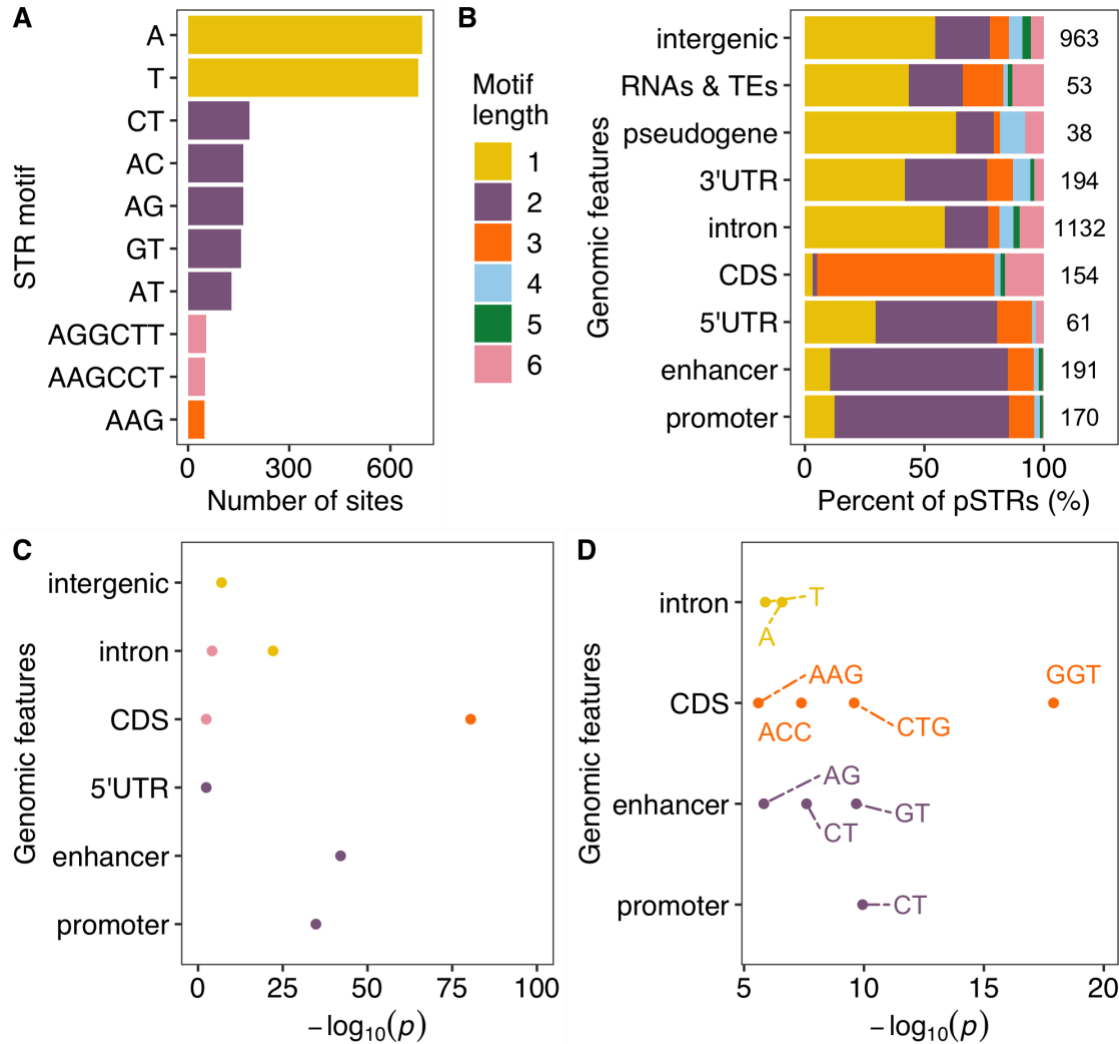

683

684 **Fig. S6**

685 Motifs and genomic features of polymorphic STRs in MA lines. (A) The top ten most frequent  
 686 motif sequences in polymorphic STRs. (B) Percent of polymorphic STRs with different motif  
 687 lengths in each genomic feature. The total number of polymorphic STRs in each genomic  
 688 feature are indicated. (C) Enriched STRs with different motif lengths (colored as in (B)) in  
 689 different genomic features are shown. (D) Enriched STR motif sequences (labeled) in different  
 690 genomic features are shown. Statistical significance (supplementary table S2) for enrichment  
 691 tests was calculated using the one-side Fisher's exact test and was corrected for multiple  
 692 comparisons (Bonferroni method).

693

694

695

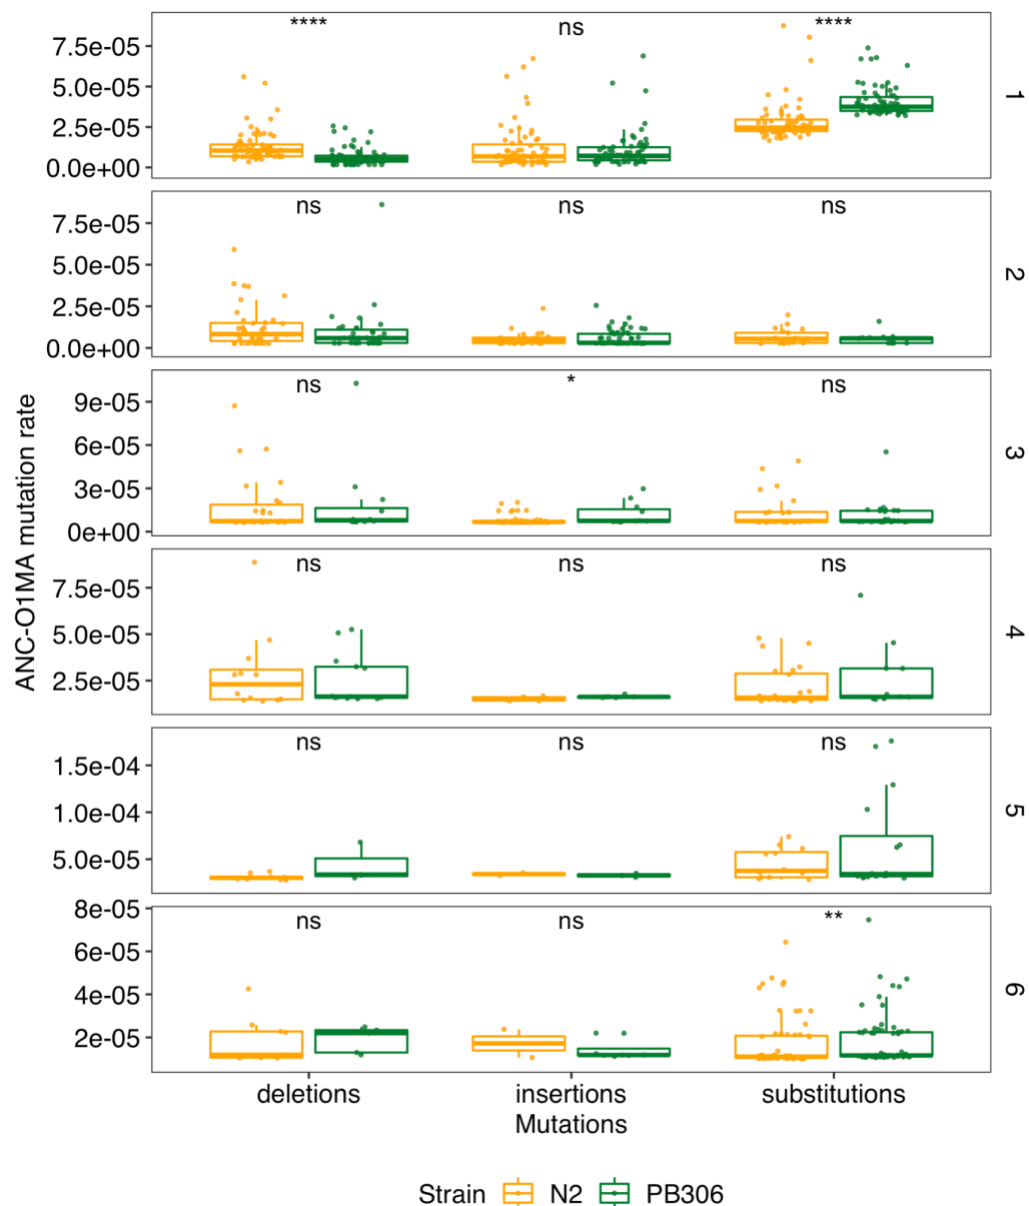

696

697 **Fig. S7**

698 Comparison of STR mutation rates of deletions, insertions, and substitutions between O1MA  
699 lines derived from N2 (orange) and PB306 (green) using pSTRs of different motif lengths. Each  
700 dot represents the mutation rate between the ancestor strain (ANC) and one of O1MA lines  
701 (ANC-O1MA). Statistical significance (supplementary table S2) of difference comparisons  
702 were calculated using the two-sided Wilcoxon test and  $p$ -values were adjusted for multiple  
703 comparisons (Bonferroni method). Significance of each comparison is shown above each  
704 comparison pair (ns: adjusted  $p > 0.05$ ; \*: adjusted  $p \leq 0.01$ ; \*\*: adjusted  $p \leq 0.001$ ; \*\*\*\*: adjusted  
705  $p \leq 0.0001$ ).

706

707

708 Supplementary Tables

709 **Table S1**

710 Reference STRs, polymorphic STRs, and pSTR expansion/contraction scores among wild  
711 *C. elegans* strains

712 **Table S2**

713 Exact adjusted *p* values in FIGs. 1D-E, 2C-D, 4B-C, E-F, S3C-D, S5, S6C-D, S7  
714

715 **Table S3**

716 Polymorphic STRs found in the MA lines.

717

718

719

720 **REFERENCES**

721 Rockman MV, Kruglyak L. 2009. Recombinational landscape and population genomics of  
722 *Caenorhabditis elegans*. *PLoS Genet.* 5:e1000419.

723

724

725
